1 **Differential introgression reveals thermal adaptation and candidate genes shaping species**  
2 **boundaries in North American box turtles (*Terrapene* spp.)**

3

4 **Running title:** Box turtle hybrid zones reveal thermal adaptations

5

6 **Authors:**

7 Bradley T. Martin<sup>1</sup>, Marlis R. Douglas<sup>1</sup>, Tyler K. Chafin<sup>1</sup>, John S. Placyk, Jr.<sup>2</sup>, Roger D.  
8 Birkhead<sup>3</sup>, Chris A. Phillips<sup>4</sup>, Michael E. Douglas<sup>1</sup>

9

10 <sup>1</sup>Department of Biological Sciences, University of Arkansas, Fayetteville, Arkansas 72701, USA;

11 Email: (BTM) [btm002@email.uark.edu](mailto:btm002@email.uark.edu) (send reprint requests to this address); (MRD):

12 [mrld1@uark.edu](mailto:mrld1@uark.edu); (TKC): [tkchafin@uark.edu](mailto:tkchafin@uark.edu); (MED): [med1@uark.edu](mailto:med1@uark.edu).

13 <sup>2</sup>Science Department, Robert E. Lee High School, Tyler, Texas, 75701, USA; Email:

14 [japlacyk@gmail.com](mailto:japlacyk@gmail.com)

15 <sup>3</sup>Alabama Science in Motion, Auburn University, Auburn, AL 36849, USA; Email:

16 [birkhrd@auburn.edu](mailto:birkhrd@auburn.edu)

17 <sup>4</sup>Illinois Natural History Survey, Prairie Research Institute, University of Illinois, Champaign, IL

18 61820; Email: [caphilli@illinois.edu](mailto:caphilli@illinois.edu)

19

20 **Disclosure statement:** Authors have nothing to disclose.

21

22 **ABSTRACT**

23           Hybridization is differentially manifested across the genome, with observed introgression  
24 representing a balance between selection and migration. The capacity to quantify introgression  
25 and subsequently pinpoint the constituent genetic elements governing cross-species exchange has  
26 been promoted by the unprecedented resolution of contemporary sequencing technologies.  
27 Furthermore, the availability of annotated reference genomes has allowed genomic patterns to be  
28 associated with ecologically relevant phenotypes. We followed this pattern herein by harnessing  
29 genomic resources to decipher the role of selection in shaping hybrid zones at the interface of  
30 species-boundaries in North American box turtles (*Terrapene*). By so doing, we identified  
31 adaptive divergence in genes related to immune system function and intrinsic thermal  
32 adaptations. These, in turn, impact temperature-dependent sex determination and hypoxia  
33 tolerance. Their patterns were then contrasted among inter- and intra- specific hybrid zones that  
34 differed in a temporal and biogeographic context. Our results demonstrate that hybridization is  
35 broadly apparent in *Terrapene*, but with varying levels of divergence at loci that impinge upon  
36 thermal adaptation. These loci displayed signatures of adaptive introgression across intraspecific  
37 boundaries, and do so despite a genome-wide selective trend against intergrades. By contrast,  
38 interspecific comparisons at the same loci retained evidence of divergence. Importantly,  
39 adaptations that shape species-boundaries in *Terrapene* not only underscore climatic boundaries  
40 for these terrestrial ectotherms, but also bookmark their vulnerability to anthropogenic pressures.

41 **Keywords:** adaptive divergence; hybrid zone; RADseq; temperature dependence; genomic cline

42

## 43 1. INTRODUCTION

44 Hybrid zones may be viewed as natural laboratories within which the genetic architecture  
45 of local adaptation or reproductive isolation can be examined. They often reflect underlying  
46 environmental gradients, and as such, are often coincident with ecological barriers (Barton &  
47 Hewitt 1985; Payseur 2010). Here, divergent selection might promote loci that underpin crucial  
48 adaptations, whereas the remainder of the genome essentially homogenizes (Via 2009; Feder *et*  
49 *al.* 2013). Once such genes can be identified, phenotypes that contribute to adaptive divergence  
50 can be inferred via a bottom-up, “reverse-ecology” approach (Li *et al.* 2008; Tiffin & Ross-Ibarra  
51 2014). Thus, hybrid zones often provide a ‘window’ into the speciation process by allowing  
52 divergent loci to be associated with various aspects of ecology (Taylor *et al.* 2015).

53 Diminishing sequencing costs coupled with an upsurge in genomic annotations have  
54 facilitated extensive application of this reverse-ecology approach within a variety of ecological  
55 contexts. Examples include inference of adaptive divergence in seasonal growth and variability in  
56 immune responses (Rödin-Mörch *et al.* 2019), biodiversity response to environmental gradients  
57 (temperature, Keller & Seehausen 2012; altitudinal, Guo *et al.* 2016; elevational, Waterhouse *et*  
58 *al.* 2018; Teske *et al.* 2019), and an increased capacity to examine contemporary effects, such as  
59 that of anthropogenic modulation of reproductive boundaries (Garroway *et al.* 2010; Taylor *et al.*  
60 2014; Grabenstein & Taylor 2018). A result is an increased resolution with which to gauge how  
61 environmental and climatic shifts over both geologic and contemporary timescales shift species  
62 distributions and alter pre-existing adaptive gradients (Rosenzweig *et al.* 2008; Taylor *et al.* 2015;  
63 Ryan *et al.* 2018). Thus, a genomic perspective enables a refined interpretation of two major  
64 patterns: 1) That reproductive boundaries among historically co-existing species often become

65 blurred under substantial environmental change, or contacts among otherwise allopatric taxa are  
66 facilitated (Rhymer & Simberloff 1996); and 2) That the inherent selection-migration balance  
67 found in hybrid zones (Key 1968; Parmesan *et al.* 1999) may be disrupted, thereby establishing  
68 them as particularly vulnerable to rapid and/or exceptional change (Seehausen *et al.* 2008; Kearns  
69 *et al.* 2018). Within this context, the application of genomic data to the study of hybrid zones  
70 provides not only a window into the phenotypic/genetic underpinnings of species boundaries, but  
71 also their temporal dynamics within a changing climate.

72         Shifting temperatures, a major component of climate change, often coincide with  
73 latitudinal changes in species distributions. This, in turn, can impact the location of hybrid zones  
74 by either strengthening (Ryan *et al.* 2018) or eroding (Muhlfeld *et al.* 2014) species boundaries.  
75 Temperature also has a broad-scale effect on species interactions by altering niche availability  
76 and net productivity (Grainger *et al.* 2018; Smith & Amarasekare 2018). It has intrinsic effects on  
77 physiological and cellular mechanisms as well (Kingsolver 2009), and directly influences growth,  
78 development, reproduction, locomotion, and immune response (Keller & Seehausen 2012). As a  
79 result, the manner by which thermal gradients interact with species boundaries has become an  
80 overriding imperative, particularly given that elevated average temperatures are a major climatic  
81 trend in the Anthropocene (Qin *et al.* 2013). Herein, we attempt to disentangle how climate  
82 change shapes species boundaries by quantifying two contrasting geographic and ecological  
83 hybrid zones found within the ectothermic North American box turtles (*Terrapene*).

84

85 1.1. *Hybridization in North American box turtles*

86 North American box turtles (Emydidae, *Terrapene*) are primarily terrestrial, and possess a  
87 dome-shaped carapace and a plastral kinesis that contribute to the shape of their rectangular  
88 phenotype (Dodd 2001). They exhibit well-known hybridization (*sensu* Rhymer & Simberloff  
89 1996) in both southeastern and midwestern North America (Milstead 1969; Dodd 2001; Cureton  
90 *et al.* 2011), and thus offer an excellent model from which to contrast regional patterns of  
91 hybridization and introgression. To do so, we evaluated four southeastern taxa [the Eastern (*T.*  
92 *carolina carolina*), Gulf Coast (*T. c. major*), Florida (*T. c. bauri*), and Three-toed (*T. mexicana*  
93 *triunguis*) box turtles (Auffenberg 1958, 1959; Milstead & Tinkle 1967; Milstead 1969; Martin *et*  
94 *al.* 2013)], and two midwestern (the Ornate box turtle, *T. ornata ornata* and *T. c. carolina*;  
95 Cureton *et al.* 2011). Each hybridizes regionally. We focus herein on two such regions of inter-  
96 and intraspecific contact.

97 One focal hybrid zone is nested within southeastern North America (Ricketts 1999), where  
98 box turtles form but one component of a biodiversity hotspot. Clear-cutting, invasive species, and  
99 altered fire regimes are widespread in this region (Stapanian *et al.* 1997, 1998; van Lear &  
100 Harlow 2002), and impact numerous endemic species (Lydeard & Mayden 1995). The region also  
101 fosters clinal intergradation and hybridization across several taxa (Remington 1968; Swenson &  
102 Howard 2004), due largely to coincident ecological and climatic transitions (Swenson & Howard  
103 2005).

104 By contrast, contact zones in midwestern North America seemingly stem from secondary  
105 contact associated with postglacial recolonization and expansion (Swenson & Howard 2005).  
106 Here, prairie-grassland habitat has been anthropogenically fragmented such that niche overlap

107 now occurs between grassland and woodland species (Johnson 1994; Samson & Knopf 1994;  
108 Rhymer & Simberloff 1996; Samson *et al.* 2004). Furthermore, while overlapping forms in the  
109 midwest represent distinct species, those in the southeast are currently recognized as subspecies  
110 (Minx 1996), despite previous molecular work suggesting specific status for both *T. m. triunguis*  
111 and *T. c. bauri* (Martin *et al.* 2013, 2014).

112 Here, we used reduced-representation (i.e., ddRAD) next-generation sequencing to  
113 contrast genome-wide patterns of clinal introgression and divergence in *Terrapene* hybrid zones  
114 that differ markedly in their temporal, biogeographic, and anthropogenic interrelationships. We  
115 then considered the function of loci under selection by mapping them to available *Terrapene*  
116 genomic and transcriptomic reference data, then deducing their relationship to ecological factors.  
117 Hybrid zone dynamics and their functional linkage to ecological gradients provide invaluable  
118 insights into the manner by which our study species respond to a changing climate. Additionally,  
119 *Terrapene* is of conservation concern throughout its respective range, with many forms protected  
120 under federal and/or state mandates (Dodd 2001; NatureServe 2015). In this regard, our research  
121 provides the context for a proactive management paradigm, as well as a model that promotes the  
122 conservation of co-occurring forms.

123

## 124 **2. MATERIALS AND METHODS**

### 125 *2.1. Tissue and DNA collection*

126 Tissues for *T. carolina*, *T. ornata*, and *T. mexicana triunguis* were collected by volunteers  
127 and agency collaborators (Table S1). Additional samples were provided by numerous museums

128 and organizations. Live animals were sampled non-invasively (e.g. blood, toenails, or toe-clips),  
129 whereas road-kills were sampled indiscriminately. Individuals from outside the focal contact  
130 zones were also sampled as reference populations, with this designation being tested in  
131 subsequent analyses. Isolation of genomic DNA was performed using spin-column DNA  
132 extraction kits: DNeasy Blood and Tissue Kits (QIAGEN), QIAamp Fast DNA Tissue Kit  
133 (QIAGEN), and E.Z.N.A. Tissue DNA Kits (Omega Bio-tek). The presence of genomic DNA  
134 was visualized and confirmed via gel electrophoresis using a 2% agarose gel.

135

## 136 *2.2. Library preparation*

137 *In silico* double digest restriction-associated DNA sequencing (ddRADseq) was carried  
138 out to optimize restriction enzyme selection, using available genomic references [Painted turtle  
139 (*Chrysemys picta*), GenBank Accession #: GCA\_000241765.2 (Shaffer *et al.* 2013); FRAGMATIC  
140 (Chafin *et al.* 2017)]. Empirical verification and optimization were performed by digesting 24  
141 samples and evaluating the distribution of these fragments using an Agilent 4200 TapeStation.  
142 Library preparation was conducted per standard protocol (Peterson *et al.* 2012), using *Pst*I  
143 (5'-CTGCA|G-3') and *Msp*I (5'-C|CGG-3') restriction enzymes. We digested ~500-1,000ng of  
144 DNA/sample at 37°C, with unique DNA barcode and sequencing adapters subsequently ligated.  
145 Prior to sequencing, quality control checks were performed at the core facility, including  
146 fragment analysis for confirmation of the correct size range. Fragment concentration was assessed  
147 with a 5,000 series Fragment Analyzer (Agilent) and quantitative real-time PCR. Individuals

148 (N=96) were pooled per lane of single-end Illumina sequencing at the University of Oregon  
149 Genomics and Cell Characterization Core Facility (Hi-Seq 4000, 1 X 100 bp; GC3F).

150

### 151 2.3. *Assembly and quality control*

152 Read quality was first quantified using FASTQC v. 0.11.5, then demultiplexed using  
153 IPYRAD v. 0.7.28, followed by alignment with the *T. mexicana triunguis* reference genome  
154 (GenBank Accession #: GCA\_002925995.2) at a distance threshold of 0.15. The assembly was  
155 restricted to reference-mapped reads to reduce potential contamination, with non-mapping reads  
156 discarded. Barcodes and adapters were trimmed in IPYRAD, as were the last five base pair (bp) of  
157 each read. Reads exceeding five bases with low PHRED quality score (<33) were discarded, and  
158 potential paralogs were filtered by excluding loci with high heterozygosity (>75%) or >2 alleles  
159 per individual. Loci were also excluded if they exhibited a sequencing depth of <20X per  
160 individual, or <50% presence across individuals.

161

### 162 2.4. *Assessing Admixture and Population Structure*

163 ADMIXTURE (Alexander *et al.* 2009) was used to assess contemporary hybridization. It  
164 employs a model-based maximum likelihood approach that estimates the proportion of ancestry  
165 shared across the genome-wide average of each individual. *K*-values ranging from *K*=1-20 were  
166 used, with 20 independent replicates per *K* ([github.com/stevemussmann/admixturePipeline](https://github.com/stevemussmann/admixturePipeline)). SNP  
167 data was pre-filtered using VCFTOOLS (Danecek *et al.* 2011). Specifically, SNPs were randomly  
168 thinned to one per locus to alleviate linkage bias, and a minimum minor allele frequency filter



169 (MAF) of 1.0% was applied to reduce bias associated with erroneous genotypes and singletons  
170 (Linck & Battey 2019). Model support across  $K$ -values was assessed by applying cross-validation  
171 (CV) that estimates error by folding random data partitions into missing data, then re-calculating  
172 ancestry proportions. Lower values of CV reflect less error, and accordingly, those  $K$ -values with  
173 the three lowest CV scores were chosen, with error summarized using two custom python  
174 packages ([github.com/stevemussmann/distruct-rerun](https://github.com/stevemussmann/distruct-rerun) and  
175 [github.com/stevemussmann/admixture\\_cv\\_sum](https://github.com/stevemussmann/admixture_cv_sum)). Output from each ADMIXTURE run was  
176 synopsisized using the CLUMPAK server (Kopelman *et al.* 2015), with each individual subsequently  
177 plotted as a stacked bar chart (*distruct* v1.1; Rosenberg 2004).

178 To corroborate ADMIXTURE, we also performed Discriminate Analysis of Principal  
179 Components (DAPC) using the *adegenet* v2.0-0 R-package with a 1.0% MAF applied (Jombart *et*  
180 *al.* 2010). The *find.clusters()* function was utilized with 1,000,000 iterations to determine the  
181 optimal  $K$  with the lowest Bayesian Information Criterion (BIC). DAPC cross-validation (100  
182 replicates, 90% training dataset) then evaluated which principle components and discriminant  
183 functions to retain, with individuals plotted against the top three DAPC axes.

184

## 185 2.5. Identifying Hybrids

186 NEWHYBRIDS (Anderson & Thompson 2002) was used to assign statistically-supported  
187 hybrids to genotype frequency classes (i.e., Pure,  $F_1$ ,  $F_2$ , and backcrosses between  $F_1$  and parental  
188 types). In doing so, the program uses Bayesian MCMC sampling to calculate the posterior  
189 probability (PP) of assignment to the pre-defined expected genotype frequency classes. The

190 *getTopLoc()* function in HYBRIDDETECTIVE (Wringe *et al.* 2017a) reduced the data to 300 loci  
191 containing the highest among-population differentiation ( $F_{ST}$ ) and lowest linkage disequilibrium  
192 correlation ( $r^2 < 0.2$ ). The initial NEWHYBRIDS burn-in was 500,000 MCMC generations followed  
193 by 2,000,000 post burn-in sweeps. Seeds were randomized and the analysis was run using the  
194 Jeffrey's prior for  $\theta$  and  $\pi$ . To train the data, individuals sampled outside the focal hybrid zones  
195 were pre-assigned as parentals. The following combinations of taxa were employed: *Terrapene*  
196 *carolina carolina* X *T. c. major*, *T. c. carolina* X *T. m. triunguis*, *T. c. major* X *T. m. triunguis*,  
197 and *T. c. carolina* X *T. o. ornata*. A PP threshold  $> 0.8$  was required for assignment into the  
198 genotype frequency classes. A power analysis was also conducted using HYBRIDDETECTIVE and  
199 PARALLELNEWHYBRID pipelines to assess convergence in three independent NEWHYBRIDS  
200 replicates, and to gauge the statistical power and accuracy of the NEWHYBRIDS results (Wringe *et*  
201 *al.* 2017b; a).

202

## 203 2.6. Functional Genomic Clines

204 For genomic cline analyses, loci were first functionally enriched in IPYRAD v.0.7.28 using  
205 the *T. m. triunguis* annotated reference. The same parameters were employed for the full-genome  
206 alignment (above), with only mapped reads retained. Genomic clines were then used to assess  
207 patterns of locus-specific ancestry, as compared to a neutral expectation derived from 1,000  
208 parametric simulations (INTROGRESS R; Gompert & Buerkle 2010). Outlier loci were then  
209 selected following a Bonferroni multiple test correction.

210

## 211 3. RESULTS

212 A total of 437 individuals (Tables S1, S2) and 13,338 unlinked reference-mapped loci were  
213 retained following quality control steps. This included 134,607 variable and 90,777  
214 parsimoniously informative sites. An additional post-alignment filter was applied to eliminate  
215 individuals with >90% missing data, resulting in a final alignment of 392 individuals.

216

### 217 3.1. ADMIXTURE across taxa

218 A post-alignment MAF of 1.0% contained 12,128 SNPs. ADMIXTURE was initially run  
219 using all sequenced taxa save those with limited sample size (i.e., *T. m. yucatanana* and *T. nelsoni*).  
220 Plots with cross-validation (CV) scores are in Fig. 1. The lowest was at  $K=5$  ( $\bar{x}=0.18065$ ,  
221  $SD=0.00217$ ; Fig. S1), with  $K=6$  ( $\bar{x}=0.18119$ ,  $SD=0.00333$ ) and  $K=7$  ( $\bar{x}=0.18321$ ,  $SD=0.00301$ )  
222 but slightly higher.

223 The all-taxa ADMIXTURE analysis at  $K=5$  yielded population structure for the outgroups  
224 (Spotted and Blanding's turtles, *Clemmys guttata* and *Emydoidea blandingii*), *T. ornata*, *T. c.*  
225 *carolina*, *T. c. major*, *T. m. triunguis*, and *T. m. mexicana*. Admixture was evident between *T. o.*  
226 *ornata* X *T. c. carolina* (EAXON), *T. c. carolina* X *T. c. major* (EAXGU), *T. c. carolina* X *T. m.*  
227 *triunguis* (EAXTT), and *T. c. major* X *T. m. triunguis* (GUXTT). Admixture primarily occurred in  
228 Illinois for EAXON where their ranges overlap, in Alabama and the Florida panhandle for  
229 EAXGU, Georgia and South Carolina for EAXTT, and Mississippi and Alabama for GUXTT.  
230 Admixture proportions for *T. c. bauri* were not well resolved due to limited sampling (N=4).

231 ADMIXTURE analyses with  $K \geq 6$  divided *T. c. major* into Florida and Mississippi  
232 subpopulations. Floridian *T. c. major* was primarily admixed with *T. c. carolina*, and those in  
233 Mississippi with *T. m. triunguis*. Finally,  $K=7$  split Illinois *T. c. carolina* into a distinct  
234 subpopulation. Given these results, ADMIXTURE was then re-run with data partitioned into  
235 southeastern and midwestern taxa. Such hierarchical partitioning is recommended because  
236 ADMIXTURE often underestimates  $K$  by detecting only the uppermost hierarchy of population  
237 structure (Evanno *et al.* 2005).

238 Partitioning the southeastern taxa with a 1.0% MAF and 90% per-individual missing data  
239 filter yielded 11,142 SNPs across 259 individuals. The lowest CV score was at  $K=4$  ( $\bar{x}=0.21851$ ,  
240  $SD=0.00016$ ), with  $K=3$  ( $\bar{x}=0.22134$ ,  $SD=0.00015$ ) and  $K=5$  ( $\bar{x}=0.22519$ ,  $SD=0.00082$ ) trailing  
241 (Fig. 2, 3, Fig. S2). The best-supported southeastern ADMIXTURE analysis depicted two distinct  
242 subpopulations in *T. c. major* (Florida and Mississippi) that stood in contrast to the all-taxa  
243 analysis. Additionally,  $K=5$  identified South Carolina *T. c. carolina* as a distinct group, with  
244 admixture apparent but not geographically meaningful. However, the all-taxon and southeastern  
245 analyses agreed that admixture was present between EAxGU (*T. c. major* from Florida and *T. c.*  
246 *carolina* from Alabama), EAxTT (Georgia and South Carolina), and GUxTT (*T. c. major* and *T.*  
247 *m. triunguis* from Mississippi and Alabama).

248 DAPC also yielded the same four southeastern groups, plus *T. c. bauri* ( $K=5$ ; Fig. S3).  
249 *Terrapene carolina bauri* was highly differentiated along axis 1 (71.9% variance explained),  
250 whereas axes 2-3 delineated the remaining southeastern taxa (17.5% and 5.73% variance  
251 explained).

252 The top three  $K$ -values for the midwestern analysis (Fig. S4) included  $K=2$  ( $\bar{x}=0.23778$ ,  
253  $SD=0.00018$ ) followed by  $K=4$  ( $\bar{x}=0.25210$ ,  $SD=0.00343$ ) and  $K=3$  ( $\bar{x}=0.25415$ ,  $SD=0.00272$ ).  
254 The  $K=2$  groups consisted of *T. c. carolina* and *T. o. ornata*/*T. o. luteola*. At  $K=3$ , *T. c. carolina*  
255 split as a distinct group from IL, although only a few of the admixture proportions approached  
256 100%. The  $K=4$  CV mean was slightly lower (Fig. S5) and split *T. o. luteola* from *T. o. ornata*,  
257 with admixture evident between them.

258

### 259 3.2. Genealogical hybrid classification

260 HYBRIDDETECTIVE confirmed convergence for inter- and intra-simulation replicates (Fig.  
261 S6) with 500,000 burn-in and 2,000,000 post-burn-in sweeps (the EAxON analysis required  
262 4,000,000 sweeps with 1,000,000 burn-in). Our power analyses suggested 90% assignment  
263 accuracy (+/-SD) for all genotype classes at a critical threshold of 0.8 (Fig. S7, S9, S11, S13).  
264 The statistical power was also high ( $\geq 0.8$ ), although some genotype classes for EAxGU displayed  
265 relatively lower power ( $< 0.8$ ) (Fig. S8, S10, S12, S14).

266 Most assigned individuals were either backcrosses ( $F_1$  hybrids X parental types) or  $F_2$ -  
267 generation hybrids (Fig. 4, Table 1). Specifically, the EAxGU analysis identified backcrosses  
268 with parental *T. c. major* and  $F_2$  hybrids in the Florida panhandle and southern Alabama (Fig.  
269 4A). Similarly, all hybrid-generation EAxTT individuals from Georgia were identified as  
270 backcrosses with both parental types, whereas South Carolina EAxTT hybrids were backcrosses  
271 with *T. c. carolina* (Fig. 4B). Second-generation hybrids and backcrosses with both parental types  
272 were evident among GUxTT (Fig. 4C). Mississippi contained individuals with all three hybrid  
273 genotype classes ( $F_2$ ,  $B_1$ , and  $B_2$ ), but with backcrosses to parental *T. m. triunguis* at the greatest

274 frequency. Alabama and Florida GUxTT were represented by only *T. m. triunguis* backcrosses.  
275 Finally, *T. o. ornata* and *T. c. carolina* in Illinois displayed a relatively low frequency of hybrid  
276 genotypes (5%) but all were F<sub>1</sub> generation, in contrast to the southeastern analyses (Fig. 4D).

277

### 278 3.3. Selective signatures at functional loci

279 The transcriptome-guided assembly contained 2,829 SNPs across 274 individuals, with  
280 subsets generated for EAxGU, EAxTT, and GUxTT. A filter applied to each alignment removed  
281 loci with less than 50% missing data per population (e.g., parent 1, parent 2, and admixed),  
282 followed by a second filter that retained only bi-allelic sites. The final alignments contained 2,660  
283 (EAxGU), 2,623 (EAxTT), and 2,622 SNPs (GUxTT). Using INTROGRESS, only SNPs with a  
284 high allele frequency differential ( $\delta > 0.8$ ) were retained (Andrés *et al.* 2013). One exception was  
285 the EAxGU analysis where  $\delta > 0.7$  was applied in that no loci were recovered at the higher  
286 threshold.

287 The genomic cline analysis recovered four outlier loci for EAxGU, and seven for EAxTT  
288 and GUxTT (Fig. 5). Two loci failed to retain significance after Bonferroni-adjusted correction.  
289 All outlier SNPs were directly associated with temperature tolerance, pathogenic resistance,  
290 temperature-dependent sex determination (TSD), and anoxia tolerance in turtles and/ or other  
291 reptiles (Table 2). Clines were not consistent among all pairwise taxon-comparisons, in that some  
292 displayed under-dominance (i.e., selection against heterozygotes), whereas others displayed  
293 patterns indicative of adaptively-driven introgression.

294 For example, three of four outlier loci in EAxGU displayed an over-representation of EA  
295 alleles in the hybrid zone, concomitant with an under-representation of heterozygotes and GU  
296 alleles. The *SULT* locus (associated with hormonal regulation during TSD) was an extreme  
297 example (Table 2; Fig. 5), with EA alleles dominant below a hybrid index of  $\sim 0.8$  (=80%  
298 assignment to GU at diagnostic loci). This pattern was replicated to a lesser degree in the *TLR9*  
299 and *ZNF236* loci associated with pathogen response and gonad development in relation to TSD.  
300 These genotypic proportions, coupled with the non-sigmoidal cline shape, suggest that  
301 introgression may be driven by the directional shift towards homozygous P<sub>1</sub> genotypes. In  
302 contrast, the genomic trend among putatively non-functional loci was a steep, sigmoidal cline.  
303 Taken together, these results suggest an underlying adaptive shift facilitating exchange of EA  
304 alleles despite divergence being maintained at the majority of loci (Fig. S15). One locus (*Oacyl*)  
305 with an extraordinarily shallow cline was an exception, although we suspect it represents an  
306 artifact of low genetic divergence among parental forms at this locus.

307 Cline shape was not consistent within the EAxTT hybrid zone. Three (of seven) outlier  
308 loci (i.e., *SASH3*, *SYPL2*, and *TLR9*) were significantly under-represented with regards to  
309 heterozygotes. Their clines displayed steep slopes, suggesting a rapid adaptive transition among  
310 parental genotypes. An additional two (of seven) loci (i.e., *CITED4*, *SLCO1A2*) reflected an  
311 overrepresentation of P<sub>2</sub> (TT), and a third (*FAM89B*) displayed three equally represented  
312 genotypes. Of note, *SLCO1A2* and *FAM89B* were not significant ( $P = 0.009$  and  $P = 0.036$ ,  
313 respectively).

314 By contrast, neutral expectations were rejected in all seven of the GUxTT clines ( $P = 0$ ;  $\alpha$   
315 = 0.007), with five (i.e., *SASH3*, *SYPL2*, *ACAD11*, *FAM89B*, and *ESPNL*) indicating a pattern of

316 underdominance, or selection against interspecific heterozygotes. A sixth (i.e., *TMEM214*)  
317 displayed a pattern of adaptive introgression with the homozygous P<sub>2</sub> (TT) genotype being  
318 overrepresented. Both the GUXTT and EAXTT analyses showed a ubiquitous signal of  
319 underdominance in non-transcriptomic loci (Fig. S15).

320

## 321 4. DISCUSSION

322 Our analyses characterized introgression in two North American box turtle hybrid zones  
323 (i.e., southeastern and midwestern North America). In the southeast, hybridization was  
324 introgressive in nature, as evidenced by numerous backcrosses and F<sub>2</sub> individuals, and a  
325 conspicuous lack of F<sub>1</sub> hybrids. We also identified specific functional loci involved in adaptive  
326 divergence between three taxa in the region. However, the midwestern hybrid zone did not show  
327 evidence of introgression, with hybrids restricted to F<sub>1</sub> at low frequency. Below we consider the  
328 functional genomic architecture of reproductive isolation in *Terrapene*, with a particular focus on  
329 clinal introgression in the southeastern hybrid zone.

330

### 331 4.1. *Functional Genomic Architecture of the Hybrid Zone in Southeastern North America*

332 Differential introgression among three southeastern hybrid zone taxa implicated several  
333 functional loci as contributing to adaptive divergence in *Terrapene*. Specifically, three loci relate  
334 to TSD during embryonic development, while others related to molecular pathways that  
335 contributed to anoxia and hypoxia tolerance in skeletal muscle and nervous tissues (N=6),



336 immune response to pathogens (N=2), and fasting blood glucose levels that stimulate feeding  
337 behavior [(N=1); see Table 2 for sources].

338         The implied functions of these genes seemingly relate to thermal adaptation. For example,  
339 anoxia/ hypoxia-related genes are associated with freeze tolerance in hibernating turtles (Storey  
340 2006), thus supporting an obvious association with thermal gradients. Here, three loci (*SYPL2*,  
341 *ACAD11*, and *TMEM214*) regulate brain function and metabolism by up-regulating Ca<sup>2+</sup>  
342 concentrations (Takeshima *et al.* 1998; Pamerter *et al.* 2016), inducing lipid metabolism (Gomez  
343 & Richards 2018), and initiating stress-induced apoptosis (Milton & Prentice 2007; Kesaraju *et*  
344 *al.* 2009; Li *et al.* 2013). Similarly, the *CITED4* gene (EAXTT) inhibits hypoxia-related  
345 transcription factors (Fox *et al.* 2004), whereas *FAM89B* (GUXTT) becomes up-regulated when  
346 physiological conditions are hypoxic (Goyal & Longo 2014). Finally, the *Oacyl* gene (EAXGU)  
347 regulates blood glucose levels when fasting (e.g. Hawksbill turtles, *Eretmochelys imbricata*;  
348 Kojima *et al.* 1999; Goldberg *et al.* 2013). *Terrapene* display elevated activity in warmer thermal  
349 conditions (Gienger & Urdiales 2017), and the gene influencing increased feeding behavior may  
350 implicate the presence of an underlying thermal gradient. Regulation of immune function is less  
351 clearly associated with underlying thermal gradients but may be tied instead to behavioral  
352 thermoregulation during infection, given that infection resistance increases at warmer  
353 temperatures (Dodd 2001; Agha *et al.* 2017).

354         Interestingly, a steep, sigmoidal cline was the dominant pattern among inter-specific  
355 comparisons (GUXTT and EAXTT), and was most clearly apparent in the EAXTT hybrid zone.  
356 This, in turn, reflects selection against interspecific heterozygotes (Fitzpatrick 2013). In contrast,  
357 the selective advantage of EA alleles in the EAXGU hybrid zone is intriguing in that it fails to

358 agree with the general genome-wide pattern of underdominance (Fig. S15). This discrepancy  
359 seemingly echoes a shifting adaptive landscape within which EA alleles are favored in hybrids  
360 under contemporary conditions.

361

#### 362 *4.2. Ramifications of Climate Change on Temperature-dependent Hybrid Zones*

363         Given the positive relationship between outlier genes and thermal adaptations, a natural  
364 extrapolation would be that a shifting thermal gradient drives differential introgression. This has  
365 multiple implications with regard to the integrity of species boundaries in a changing climate. In  
366 one scenario, a shifting adaptive landscape promotes hybridization by contravening long-term  
367 reproductive isolation (as with EAxGU), with subsequent introgression observed at specific loci  
368 (as herein). Alternatively, rapid environmental change simply outpaces the selective filtering of  
369 maladaptive variants, with a subsequent decrease in fitness (Kokko *et al.* 2017). This would be  
370 particularly evident when effective population sizes are already depressed following a population  
371 bottleneck (Chafin *et al.* 2019). Here, extreme rates of change may also be associated with a  
372 genetic swamping effect (Todesco *et al.* 2016). Both scenarios implicate anthropogenic pressures  
373 as governing the fates of taxa in tension-zones across diverse taxa (Taylor *et al.* 2015).

374         Our emphasis is that ectothermic vertebrates are exceptionally vulnerable to such  
375 contemporary pressures. They pose a high extinction risk due to their strong reliance on  
376 environmental thermoregulation, and their dependence on suitable habitat (Gibbons *et al.* 2000;  
377 Sinervo *et al.* 2010; Winter *et al.* 2016). Indeed, ectotherms can exhibit reduced fitness and  
378 growth-rates when operating in conditions warmer than their thermal optima (Deutsch *et al.*

379 2008; Martin & Huey 2008; Huey *et al.* 2012; Huey & Kingsolver 2019). Increased temperatures  
380 can also affect physiological pathways that are comparable with each of the genes described  
381 herein, such as increasing metabolic rates (Dillon *et al.* 2010), intensifying hypoxic stress despite  
382 higher temperature-driven O<sub>2</sub> demands (Huey & Ward 2005), heightening disease transmission  
383 (Pounds *et al.* 2006), or even the over-extension of thermal tolerances (Sinervo *et al.* 2010; Ceia-  
384 Hasse *et al.* 2014).

385         Typical evolutionary responses to insufficient thermal conditions include local adaptation  
386 (Holt 1990; Norberg *et al.* 2012; Bush *et al.* 2016), physiological and behavioral mechanisms (i.e.  
387 thermoregulation, phenology), plasticity (Urban *et al.* 2014; Sgrò *et al.* 2016), or shifts in species  
388 distributions (Parmesan *et al.* 1999; Parmesan & Yohe 2003; Moreno-Rueda *et al.* 2012). On the  
389 other hand, local extirpation or extinction reflect an inability to sufficiently respond (Sinervo *et*  
390 *al.* 2010). However, evolutionary responses to environmental change are limited, in that they  
391 seemingly operate over much longer timescales than contemporary climate change, particularly  
392 when behavioral thermoregulators are considered (Buckley *et al.* 2015). Maintaining phenotypic  
393 plasticity also has intrinsic costs (Chevin *et al.* 2010), and the capacity of organisms to acclimate  
394 remains quite variable (Seebacher *et al.* 2015). Finally, dispersal requires connectivity to suitable  
395 habitat, a particular problem for amphibians and reptiles due to extensive habitat loss and  
396 fragmentation (Gibbons *et al.* 2000; Douglas *et al.* 2016). In addition, connectivity can be  
397 blocked due to range expansions by generalists, or by hybridization with closely related species

398 (Hewitt 1999, 2000, 2001; Blois *et al.* 2013). Thus, the rate of anthropogenic change may act to  
399 curtail those natural responses typically demonstrated by biodiversity.

400

#### 401 4.3. *Regional and Taxon-specific Perspectives*

402 The southeastern hybrid zone features a far greater abundance of later-generation hybrids  
403 ( $F_2$ 's and backcrosses) and a conspicuous lack of  $F_1$ 's. The narrow widths of transcriptomic clines  
404 suggest selection against hybrids, and both NEWHYBRIDS and the genomic/ transcriptomic cline  
405 analyses support our argument that the hybrid zone represents a tension-zone. As such, it is  
406 primarily governed by selection against relatively less-fit hybrids (Bazykin 1969; Barton &  
407 Hewitt 1985). Given that tension-zones are often temporally and spatially unstable, as well as  
408 being environmentally independent (Barton & Hewitt 1985; Buggs 2007), an understanding of  
409 their dynamics will be an important consideration for future conservation efforts.

410 The largest anthropogenic impact worldwide is habitat loss, with deforestation, land-use  
411 change, and increasing urbanization and agriculture most important in the southeast. Also,  
412 alterations in species composition instigated by invasive species is an important consideration, as  
413 are more frequent and extreme weather patterns due to climate change (Wear & Greis 2002;  
414 Mourtzinis *et al.* 2016; Park *et al.* 2017). These aspects will only be exacerbated going forward,  
415 as species distributions and abiotic habitats are driven northward (Desantis *et al.* 2007; Doyle *et*  
416 *al.* 2010; Davis *et al.* 2015; Raabe & Stumpf 2016). Accordingly, conservation efforts must focus  
417 on connectivity at the population-level by providing “stepping stone patches” of habitat along a  
418 latitudinal vector. These can allow species to disperse northward in response to climatic

419 conditions, but do not necessitate complete continuity between patches. Recent research in the  
420 Gulf Coastal Plain serves as a proof-of-concept, with latitudinal range shifts being successful  
421 despite artificially-created refuge habitat that is both sub-optimal and previously uninhabited by  
422 the focal species (Cannizzo & Griffen 2019).

423         Furthermore, our data suggests a capacity for inter- and intraspecific adaptive  
424 introgression in this region. However, long term consequences are unknown – introgression may  
425 facilitate evolutionary rescue (Oziolor *et al.* 2019), or drive extirpation either through genetic  
426 swamping of species or their merger (Todesco *et al.* 2016). Also unknown are the levels of  
427 introgression that govern this relationship, as well as the demographic scenarios conducive to  
428 each. Similarly, the rate of environmental change and fitness consequences of hybridization will  
429 also be indeterminate.

430         By contrast, the midwestern hybrid zone had a paucity of late-generation hybrids  
431 consistent with reproductive isolation accumulated prior to post-glacial secondary contact.  
432 Contemporary and predicted climatic pressures in the midwest include higher temperatures and  
433 more intense precipitation interspersed by extended drought, with forested habitat being the most  
434 severely affected (Pryor *et al.* 2014). Alternatively, agricultural expansion has already fragmented  
435 the native prairie grassland habitat on which some endemic species depend (Samson *et al.* 2004;  
436 Mussmann *et al.* 2017), potentially reducing biodiversity and eroding species boundaries by  
437 reintroducing ecologically divergent species (Haddad *et al.* 2015; Grabenstein & Taylor 2018).  
438 The midwest may thus be subject to a bi-directional assault on both forested and prairie-grassland  
439 habitat. Our data from the midwestern hybrid zone support such a breakdown in ecological  
440 barriers, likely due to fragmentation of the prairie-grassland habitat. Maintaining habitat

441 connectivity is crucial in this sense, and the development of “stepping stone” prairie grassland  
442 patches (as above) may prove sufficient (Wimberly *et al.* 2018).

443 Many turtle species are at elevated risks from climate change due to their long generation  
444 times and because they employ TSD during embryonic development. Here, climate change can  
445 skew sex-ratios and promote demographic collapse, with male bias initiated by warmer  
446 temperatures, and vice versa (Janzen 1994). Similarly, long generation times can also restrict the  
447 adaptive capacity of turtles in a rapidly changing climate (Hoffmann *et al.* 2017). Our study  
448 suggests that reproductive isolation in turtles involves mechanisms that regulate TSD, among  
449 other potential thermal adaptations. Clearly, temperature plays a prominent role in chelonian  
450 ecology.

451 Several *Terrapene*-specific conclusions are evident from our data. First, our ADMIXTURE  
452 analyses indicate the presence of discrete *T. c. major* populations in Florida and Mississippi.  
453 These implicate the Alabama and Apalachicola river drainages as biogeographic barriers. This  
454 variability was markedly absent in previous morphological analyses (Butler *et al.* 2011), which  
455 suggested that *T. c. major* may not be a distinct lineage but instead represents an area of  
456 admixture between other *Terrapene* in the region. We did indeed detect considerable admixture  
457 between *T. c. major*, *T. c. carolina*, and *T. m. triunguis*, but the two putatively pure *T. c. major*  
458 populations in the Mississippi/ Alabama panhandles, and the southeastern portion of the Florida  
459 panhandle, suggest the presence of cryptic genetic variation (Douglas *et al.* 2009). Given this, the  
460 two populations potentially represent distinct evolutionary significant units (ESU’s) or  
461 management units (MU’s). Second, admixture is apparent among multiple southeastern  
462 *Terrapene*, excluding *T. c. bauri*, which explained the greatest DAPC axis variation. This is

463 likely attributed to vicariance in the Florida Peninsula, where the Okefenokee Trough divided  
464 northern and southern Florida during the Pliocene (Bert 1986; Douglas *et al.* 2009). Third, the  
465 presence of selection against interspecific hybrids indicates that intermediate phenotypes are  
466 unfavorable in the hybrid zones, but the intraspecific analyses reflect patterns of adaptive  
467 introgression favoring EA alleles in hybrids. Each of these aspects will require careful  
468 consideration when conservation efforts are planned or implemented, particularly given that  
469 *Terrapene* are in decline throughout their range (Dodd 2001).

470         Specifically, the maintenance of latitudinal habitat connectivity can mitigate climate  
471 change by allowing dispersal northward. However, promoting habitat connectivity, yet limiting  
472 the homogenizing effects of introgression, will prove more difficult for *T. c. major* given its  
473 comparatively narrow range that is surrounded by three other *Terrapene* taxa in the Gulf Coast  
474 region. However, the two putatively “pure” populations coincident with the Apalachicola and  
475 Alabama river drainages may offer reference populations for conservation focus. Though  
476 *Terrapene* is primarily terrestrial, some freshwater turtles display similar phylogeographic  
477 patterns associated with these and other regional drainages (Roman *et al.* 1999), and may thus  
478 provide additional management foci.

479         On the other hand, *T. ornata* and *T. carolina* are separated by greater genetic distances than  
480 are the southeastern taxa (Martin *et al.* 2013), and accordingly the lack of hybrids beyond F<sub>1</sub> may  
481 reflect intrinsic genetic incompatibilities (Barton 2001; Abbott *et al.* 2013). The low frequency of  
482 F<sub>1</sub> hybrids in the Illinois ONxEA population may be facilitated by recent degradation of the  
483 prairie grassland habitat (Manning 2001; Mussmann *et al.* 2017) that, in turn, initiated increased  
484 heterospecific contact. However, this hypothesis cannot be explicitly tested herein. It should be

485 noted that our ONxEA results differ from that of Cureton *et al.* (2011) who depicted potential  
486 introgressive hybridization between these two taxa based on mitochondrial DNA and multiple  
487 microsatellite markers. Our genome-wide data, on the other hand, recovered only F<sub>1</sub>'s. We  
488 attribute this discrepancy to the increased capacity for assignment in our data, although a regional  
489 disparity between our respective sampling areas may also be a possibility.

490 While our analyses concentrated on *Terrapene*, the focal hybrid zones represent diverse taxa  
491 including reptiles, plants, mammals, birds, and amphibians (Remington 1968; Swenson &  
492 Howard 2005; Rissler & Smith 2010). For example, a genome-wide assessment of introgression  
493 in musk turtles (*Sternotherus*) inhabiting a spatially overlapping hybrid zone corroborates the  
494 patterns identified herein (Scott *et al.* 2019). The latter identified southeastern North America as a  
495 focal point for ongoing hybridization and introgression, with a similar paucity of F<sub>1</sub> hybrids, with  
496 differential introgression relating to ecological gradients and/or biogeographic breaks. Therefore,  
497 the changes observed in clinal patterns of *Terrapene* may be a proxy for the manner by which  
498 contemporary pressures affect co-distributed taxa.

499

#### 500 4.4. *Conclusions*

501 Two important evolutionary implications are evident in our data. First, we demonstrated  
502 differential introgression along an ecological gradient in three taxa inhabiting a North American  
503 tension-zone. We then assessed genomic and transcriptomic SNPs to identify several genes  
504 whose functions are consistent with physiological processes related to thermal ecology, and thus  
505 capable of promoting adaptive divergence. In this sense, they describe ecological gradients



506 related to TSD, anoxia/ hypoxia tolerance, immune response, and feeding behavior in a hybrid  
507 zone encompassing three terrestrial turtle taxa. Second, we characterized a tension-zone in  
508 southeastern North America that is susceptible to anthropogenic and environmental changes, and  
509 which involves a wide variety of taxonomic groups (Remington 1968; Swenson & Howard 2005;  
510 Rissler & Smith 2010). It is evident from our results that NGS population genomic methods such  
511 as ddRAD can broaden our capacity to identify population structure and detect introgression,  
512 whereas traditional Sanger sequencing methods were inadequate to do so (Butler *et al.* 2011;  
513 Martin *et al.* 2013). Importantly, the NGS approaches can also link contemporary ecology with  
514 evolutionary and speciation processes, and accordingly help bridge the gap between these  
515 disciplines.

516

## 517 **ACKNOWLEDGEMENTS**

518 The research herein was conducted in partial fulfillment of the Ph.D. degree in Biological  
519 Sciences at the University of Arkansas (BTM). We would like to extend our gratitude to the  
520 countless volunteers and organizations who collected and/ or provided tissue samples (Table S1).  
521 We also thank the current and former members of the Douglas Lab and University of Arkansas  
522 faculty who provided advice and support, especially A. Alverson, W. Anthonysamy, M. Bangs,  
523 S. Mussmann, J. Pummill, and Z. Zbinden. Sample collections were approved under the  
524 University of Texas-Tyler Animal Care and Use Committee (IACUC) permit #113 and  
525 University of Illinois IACUC protocols 16160 and 18000. Funding was provided by the Box  
526 Turtle Conservation Committee, the American Turtle Observatory (ATO), and the following  
527 endowments: The Bruker Professorship in Life Sciences (MRD) and the Twenty-First Century

528 Chair in Global Change Biology (MED). Analytical resources were provided by the Arkansas  
529 High Performance Computing Cluster (AHPCC) and an NSF-XSEDE Research Allocation (TG-  
530 BIO160065) that allowed access the Jetstream cloud service.

531

## 532 **5. REFERENCES**

533 Abbott R, Albach D, Ansell S *et al.* (2013) Hybridization and Speciation. *Journal of Evolutionary*  
534 *Biology*, **26**, 229–246.

535 Agha M, Price S, Nowakowski A, Augustine B, Todd B (2017) Mass mortality of eastern box  
536 turtles with upper respiratory disease following atypical cold weather. *Diseases of Aquatic*  
537 *Organisms*, **124**, 91–100.

538 Alexander DH, Novembre J, Lange K (2009) Fast model-based estimation of ancestry in  
539 unrelated individuals. *Genome Research*, **19**, 1655–1664.

540 Anderson EC, Thompson EA (2002) A model-based method for identifying species hybrids using  
541 multilocus genetic data. *Genetics*, **160**, 1217–1229.

542 Andrés JA, Larson EL, Bogdanowicz SM, Harrison RG (2013) Patterns of transcriptome  
543 divergence in the male accessory gland of two closely related species of field crickets.  
544 *Genetics*, **193**, 501–13.

545 Auffenberg W (1958) Fossil turtles of the genus *Terrapene* in Florida. *Bulletin of the Florida*  
546 *State Museum*, **3**, 53–92.

547 Auffenberg W (1959) A Pleistocene *Terrapene* hibernaculum, with remarks on a second  
548 complete box turtle skull from Florida. *Quarterly Journal of the Florida Academy of*  
549 *Science*, **22**, 49–53.

550 Babik W, Dudek K, Fijarczyk A *et al.* (2015) Constraint and Adaptation in newt Toll-Like  
551 Receptor Genes. *Genome Biology and Evolution*, **7**, 81–95.

552 Barton NH (2001) The role of hybridization in evolution. *Molecular Ecology*, **10**, 551–568.

553 Barton NH, Hewitt GM (1985) Analysis of hybrid zones. *Annual Review of Ecology and*  
554 *Systematics*, **16**, 113–148.

555 Bazykin AD (1969) Hypothetical mechanism of speciation. *Evolution*, **23**, 685–687.

556 Bert T (1986) Speciation in western Atlantic stone crabs (genus *Menippe*): the role of geological  
557 processes and climatic events in the formation and distribution of species. *Marine Biology*,  
558 **93**, 157–170.

559 Blois JL, Zarnetske PL, Fitzpatrick MC, Finnegan S (2013) Climate change and the past, present,

- 560 and future of biotic interactions. *Science*, **341**, 499–504.
- 561 Bowden RM, Ewert MA, Nelson CE (2000) Environmental sex determination in a reptile varies  
562 seasonally and with yolk hormones. *Proceedings of the Royal Society of London. Series B:*  
563 *Biological Sciences*, **267**, 1745–1749.
- 564 Buckley LB, Ehrenberger JC, Angilletta MJ (2015) Thermoregulatory behaviour limits local  
565 adaptation of thermal niches and confers sensitivity to climate change. *Functional Ecology*,  
566 **29**, 1038–1047.
- 567 Buggs RJA (2007) Empirical study of hybrid zone movement. *Heredity*, **99**, 301–312.
- 568 Bush A, Mokany K, Catullo R *et al.* (2016) Incorporating evolutionary adaptation in species  
569 distribution modelling reduces projected vulnerability to climate change. *Ecology Letters*,  
570 **19**, 1468–1478.
- 571 Butler JM, Dodd Jr. CK, Aresco M, Austin JD (2011) Morphological and molecular evidence  
572 indicates that the Gulf Coast box turtle (*Terrapene carolina major*) is not a distinct  
573 evolutionary lineage in the Florida Panhandle. *Biological Journal of the Linnean Society*,  
574 **102**, 889–901.
- 575 Campbell LJ, Hammond SA, Price SJ *et al.* (2018) A novel approach to wildlife transcriptomics  
576 provides evidence of disease-mediated differential expression and changes to the  
577 microbiome of amphibian populations. *Molecular Ecology*, **27**, 1413–1427.
- 578 Cannizzo ZJ, Griffen BD (2019) An artificial habitat facilitates a climate-mediated range  
579 expansion into a suboptimal novel ecosystem. *PLOS ONE*, **14**, e0211638.
- 580 Ceia-Hasse A, Sinervo B, Vicente L, Pereira HM (2014) Integrating ecophysiological models into  
581 species distribution projections of European reptile range shifts in response to climate  
582 change. *Ecography*, **37**, 679–688.
- 583 Chafin TK, Douglas MR, Martin BT, Douglas ME (2019) Hybridization drives genetic erosion in  
584 sympatric desert fishes of western North America. *Heredity*, 1–15.
- 585 Chafin TK, Martin BT, Mussmann SM, Douglas MR, Douglas ME (2017) FRAGMATIC: in  
586 silico locus prediction and its utility in optimizing ddRADseq projects. *Conservation*  
587 *Genetics Resources*, **451**, 1–4.
- 588 Chevin L-M, Lande R, Mace GM (2010) Adaptation, Plasticity, and Extinction in a Changing  
589 Environment: Towards a Predictive Theory. *PLOS Biology*, **8**, e1000357.
- 590 Cureton JC, Buchman AB, Deaton R, Lutterschmidt WI (2011) Molecular analysis of  
591 hybridization between the box turtles *Terrapene carolina* and *T. ornata*. *Copeia*, **2011**, 270–  
592 277.
- 593 Czerwinski M, Natarajan A, Barske L, Looger LL, Capel B (2016) A timecourse analysis of  
594 systemic and gonadal effects of temperature on sexual development of the red-eared slider  
595 turtle *Trachemys scripta elegans*. *Developmental Biology*, **420**, 166–177.

- 596 Danecek P, Auton A, Abecasis G *et al.* (2011) The variant call format and VCFtools.  
597 *Bioinformatics*, **27**, 2156–2158.
- 598 Davis MA, Douglas MR, Webb CT *et al.* (2015) Nowhere to go but up: Impacts of climate  
599 change on demographics of a short-range endemic (*Crotalus willardi obscurus*) in the sky-  
600 islands of Southwestern North America. *PLOS ONE*, **10**, e0131067.
- 601 Desantis LRG, Bhotika S, Williams K, Putz FE (2007) Sea-level rise and drought interactions  
602 accelerate forest decline on the Gulf Coast of Florida, USA. *Global Change Biology*, **13**,  
603 2349–2360.
- 604 Deutsch CA, Tewksbury JJ, Huey RB *et al.* (2008) Impacts of climate warming on terrestrial  
605 ectotherms across latitude. *Proceedings of the National Academy of Sciences*, **105**, 6668–  
606 6672.
- 607 Dillon ME, Wang G, Huey RB (2010) Global metabolic impacts of recent climate warming.  
608 *Nature*, **467**, 704–706.
- 609 Dodd KC (2001) *North American Box Turtles, A Natural History*. University of Oklahoma Press,  
610 Norman, OK, USA.
- 611 Douglas MR, Davis MA, Amarello M *et al.* (2016) Anthropogenic impacts drive niche and  
612 conservation metrics of a cryptic rattlesnake on the Colorado Plateau of western North  
613 America. *Royal Society*, **3**, 160047.
- 614 Douglas ME, Douglas MR, Schuett GW, Porras LW (2009) Climate change and evolution of the  
615 New World pitviper genus *Agkistrodon* (Viperidae). *Journal of Biogeography*, **36**, 1164–  
616 1180.
- 617 Doyle TW, Krauss KW, Conner WH, From AS (2010) Predicting the retreat and migration of  
618 tidal forests along the northern Gulf of Mexico under sea-level rise. *Forest Ecology and  
619 Management*, **259**, 770–777.
- 620 Evanno G, Regnaut S, Goudet J (2005) Detecting the number of clusters of individuals using the  
621 software structure: a simulation study. *Molecular Ecology*, **14**, 2611–2620.
- 622 Feder JL, Flaxman SM, Egan SP, Nosil P (2013) Hybridization and the build-up of genomic  
623 divergence during speciation. *Journal of Evolutionary Biology*, **26**, 261–266.
- 624 Fitzpatrick BM (2013) Alternative forms for genomic clines. *Ecology and Evolution*, **3**, 1951–  
625 1966.
- 626 Fox SB, Braganca J, Turley H *et al.* (2004) CITED4 inhibits hypoxia-activated transcription in  
627 cancer cells, and its cytoplasmic location in breast cancer is associated with elevated  
628 expression of tumor cell hypoxia-inducible factor 1 $\alpha$ . *Cancer Research*, **64**, 6075–6081.
- 629 Garroway CJ, Bowman J, Cascaden TJ *et al.* (2010) Climate change induced hybridization in  
630 flying squirrels. *Global Change Biology*, **16**, 113–121.
- 631 Gibbons JW, Scott DE, Ryan TJ *et al.* (2000) The global decline of reptiles, déjà vu amphibians:

- 632 reptile species are declining on a global scale. Six significant threats to reptile populations  
633 are habitat loss and degradation, introduced invasive species, environmental pollution,  
634 disease, unsustainable use, and global climate change. *Bioscience*, **50**, 653–666.
- 635 Gienger CM, Urdiales EM (2017) Influences on Standard Metabolism in Eastern Box Turtles  
636 (*Terrapene carolina*). *Chelonian Conservation and Biology*, **16**, 159–163.
- 637 Goldberg DW, Leitao SAT, Godfrey MH *et al.* (2013) Ghrelin and leptin modulate the feeding  
638 behaviour of the hawksbill turtle *Eretmochelys imbricata* during nesting season.  
639 *Conservation Physiology*, **1**, cot016–cot016.
- 640 Gomez CR, Richards JG (2018) Mitochondrial responses to anoxia exposure in red eared sliders  
641 (*Trachemys scripta*). *Comparative Biochemistry and Physiology Part B: Biochemistry and*  
642 *Molecular Biology*, **224**, 71–78.
- 643 Gompert Z, Buerkle AC (2010) INTROGRESS: a software package for mapping components of  
644 isolation in hybrids. *Molecular Ecology Resources*, **10**, 378–384.
- 645 Goyal R, Longo LD (2014) Acclimatization to long-term hypoxia: gene expression in ovine  
646 carotid arteries. *Physiological Genomics*, **46**, 725–734.
- 647 Grabenstein KC, Taylor SA (2018) Breaking barriers: causes, consequences, and experimental  
648 utility of human-mediated hybridization. *Trends in Ecology and Evolution*, **33**, 198–212.
- 649 Grainger TN, Rego AI, Gilbert B (2018) Temperature-dependent species interactions shape  
650 priority effects and the persistence of unequal competitors. *The American Naturalist*, **191**,  
651 197–209.
- 652 Guo B, Lu D, Liao WB, Merilä J (2016) Genomewide scan for adaptive differentiation along  
653 altitudinal gradient in the Andrew’s toad *Bufo andrewsi*. *Molecular Ecology*, **25**, 3884–  
654 3900.
- 655 Haddad NM, Brudvig LA, Clobert J *et al.* (2015) Habitat fragmentation and its lasting impact on  
656 Earth’s ecosystems. *Science Advances*, **1**, e1500052.
- 657 Hewitt GM (1999) Post-glacial re-colonization of European biota. *Biological Journal of the*  
658 *Linnaean Society*, **68**, 87–112.
- 659 Hewitt GM (2000) The genetic legacy of the Quaternary ice ages. *Nature*, **405**, 907–913.
- 660 Hewitt GM (2001) Speciation, hybrid zones and phylogeography—or seeing genes in space and  
661 time. *Molecular Ecology*, **10**, 537–549.
- 662 Hoffmann AA, Sgrò CM, Kristensen TN (2017) Revisiting adaptive potential, population size,  
663 and conservation. *Trends in Ecology and Evolution*, **32**, 506–517.
- 664 Holt RD (1990) The microevolutionary consequences of climate change. *Trends in Ecology and*  
665 *Evolution*, **5**, 311–315.
- 666 Huey RB, Kearney MR, Krockenberger A *et al.* (2012) Predicting organismal vulnerability to  
667 climate warming: roles of behaviour, physiology and adaptation. *Philosophical Transactions*

- 668 *of the Royal Society B: Biological Sciences*, **367**, 1665–1679.
- 669 Huey RB, Kingsolver JG (2019) Climate warming, resource availability, and the metabolic  
670 meltdown of ectotherms. *The American Naturalist*, DOI: 10.1086/705679.
- 671 Huey RB, Ward PD (2005) Hypoxia, global warming, and terrestrial late Permian extinctions.  
672 *Science*, **308**, 398–401.
- 673 Janzen FJ (1994) Climate change and temperature-dependent sex determination in reptiles.  
674 *Proceedings of the National Academy of Sciences of the United States of America*, **91**, 7487–  
675 90.
- 676 Johnson W (1994) Woodland expansion in the Platte River, Nebraska: patterns and causes.  
677 *Ecological Monographs*, **64**, 45–84.
- 678 Jombart T, Devillard S, Balloux F (2010) Discriminant analysis of principal components: a new  
679 method for the analysis of genetically structured populations. *BMC Genetics*, **11**, 94.
- 680 Kearns AM, Restani M, Szabo I *et al.* (2018) Genomic evidence of speciation reversal in ravens.  
681 *Nature Communications*, **9**, 906.
- 682 Keller I, Seehausen O (2012) Thermal adaptation and ecological speciation. *Molecular Ecology*,  
683 **21**, 782–799.
- 684 Kesaraju S, Schmidt-Kastner R, Prentice HM, Milton SL (2009) Modulation of stress proteins  
685 and apoptotic regulators in the anoxia tolerant turtle brain. *Journal of Neurochemistry*, **109**,  
686 1413–1426.
- 687 Key KHL (1968) The Concept of Stasipatric Speciation. *Systematic Biology*, **17**, 14–22.
- 688 Kingsolver JG (2009) The well-temperated biologist. (American Society of Naturalists  
689 Presidential Address). *The American Naturalist*, **174**, 755–68.
- 690 Kojima M, Hosoda H, Date Y *et al.* (1999) Ghrelin is a growth-hormone-releasing acylated  
691 peptide from stomach. *Nature*, **402**, 656–660.
- 692 Kokko H, Chaturvedi A, Croll D *et al.* (2017) Can evolution supply what ecology demands?  
693 *Trends in Ecology and Evolution*, **32**, 187–197.
- 694 Kopelman NM, Mayzel J, Jakobsson M, Rosenberg NA, Mayrose I (2015) CLUMPAK: a  
695 program for identifying clustering modes and packaging population structure inferences  
696 across *K*. *Molecular Ecology Resources*, **15**, 1179–1191.
- 697 van Lear DH, Harlow RF (2002) Fire in the eastern United States: influence on wildlife habitat.  
698 In: *Proceedings: the role of fire for nongame wildlife management and community*  
699 *restoration: traditional uses and new directions. General Technical Report 288* (eds Ford  
700 W., Russell KR, Moorman CE), pp. 2–10. US Dept. of Agriculture, Forest Service,  
701 Northeastern Research Station.
- 702 Li YF, Costello JC, Holloway AK, Hahn MW (2008) “Reverse ecology” and the power of  
703 population genomics. *Evolution*, **62**, 2984–2994.



- 704 Li C, Wei J, Li Y *et al.* (2013) Transmembrane Protein 214 (TMEM214) mediates endoplasmic  
705 reticulum stress-induced caspase 4 enzyme activation and apoptosis. *The Journal of*  
706 *Biological Chemistry*, **288**, 17908–17.
- 707 Linck EB, Battey CJ (2019) Minor allele frequency thresholds strongly affect population  
708 structure inference with genomic datasets. *Molecular Ecology Resources*, 0–2.
- 709 Lydeard C, Mayden RL (1995) A diverse and endangered aquatic ecosystem of the southeast  
710 United States. *Conservation Biology*, **9**, 800–805.
- 711 Manning B (2001) *Critical Trends in Illinois Ecosystems*. Illinois Department of Natural  
712 Resources. Springfield, IL.
- 713 Martin BT, Bernstein NP, Birkhead RD *et al.* (2013) Sequence-based molecular phylogenetics  
714 and phylogeography of the American box turtles (*Terrapene* spp.) with support from DNA  
715 barcoding. *Molecular Phylogenetics and Evolution*, **68**, 119–134.
- 716 Martin BT, Bernstein NP, Birkhead RD *et al.* (2014) On the reclassification of the *Terrapene*  
717 (Testudines: Emydidae): a response to Fritz & Havaš. *Zootaxa*, **3835**, 292–294.
- 718 Martin TL, Huey RB (2008) Why suboptimal is optimal: Jensen’s inequality and ectotherm  
719 thermal preferences. *The American Naturalist*, **171**, E102–18.
- 720 Milstead WW (1969) Studies on the evolution of the box turtles (genus *Terrapene*). *Bulletin of*  
721 *the Florida State Museum, Biological Science Series*, **14**, 1–113.
- 722 Milstead WW, Tinkle DW (1967) *Terrapene* of Western Mexico, with comments on species  
723 groups in the genus. *Copeia*, **1967**, 180–187.
- 724 Milton SL, Prentice HM (2007) Beyond anoxia: the physiology of metabolic downregulation and  
725 recovery in the anoxia-tolerant turtle. *Comparative Biochemistry and Physiology Part A:*  
726 *Molecular & Integrative Physiology*, **147**, 277–290.
- 727 Minx P (1996) Phylogenetic relationships among the box turtles, Genus *Terrapene*.  
728 *Herpetologica*, **52**, 584–597.
- 729 Moreno-Rueda G, Pleguezuelos JM, Pizarro M, Montori A (2012) Northward shifts of the  
730 distributions of Spanish reptiles in association with climate change. *Conservation Biology*,  
731 **26**, 278–283.
- 732 Mourtzinis S, Ortiz B V., Damianidis D (2016) Climate change and ENSO effects on  
733 southeastern US climate patterns and maize yield. *Scientific Reports*, **6**, 29777.
- 734 Muhlfeld CC, Kovach RP, Jones LA *et al.* (2014) Invasive hybridization in a threatened species  
735 is accelerated by climate change. *Nature Climate Change*, **4**, 620–624.
- 736 Mussmann SM, Douglas MR, Anthonysamy WJB *et al.* (2017) Genetic rescue, the greater prairie  
737 chicken and the problem of conservation reliance in the Anthropocene. *Royal Society Open*  
738 *Science*, **4**, 160736.
- 739 NatureServe (2015) NatureServe Explorer: An online encyclopedia of life [web application].

- 740 Version 7.1. NatureServe, Arlington, Virginia. <http://www.natureserve.org/> [date accessed:  
741 13 Oct 2016].
- 742 Norberg J, Urban MC, Vellend M, Klausmeier CA, Loeuille N (2012) Eco-evolutionary  
743 responses of biodiversity to climate change. *Nature Climate Change*, **2**, 747–751.
- 744 Oziolor EM, Reid NM, Yair S *et al.* (2019) Adaptive introgression enables evolutionary rescue  
745 from extreme environmental pollution. *Science*, **364**, 455–457.
- 746 Paitz RT, Bowden RM (2008) A proposed role of the sulfotransferase/sulfatase pathway in  
747 modulating yolk steroid effects. *Integrative and Comparative Biology*, **48**, 419–427.
- 748 Pamerter ME, Gomez CR, Richards JG, Milsom WK (2016) Mitochondrial responses to  
749 prolonged anoxia in brain of red-eared slider turtles. *Biology Letters*, **12**, 20150797.
- 750 Park WA, Cook BI, Smerdon JE *et al.* (2017) The 2016 southeastern U.S. drought: an extreme  
751 departure from centennial wetting and cooling. *Journal of Geophysical Research:*  
752 *Atmospheres*, **122**, 10,888–10,905.
- 753 Parmesan C, Ryrholm N, Stefanescu C *et al.* (1999) Poleward shifts in geographical ranges of  
754 butterfly species associated with regional warming. *Nature*, **399**, 579–583.
- 755 Parmesan C, Yohe G (2003) A globally coherent fingerprint of climate change impacts across  
756 natural systems. *Nature*, **421**, 37–42.
- 757 Payseur BA (2010) Using differential introgression in hybrid zones to identify genomic regions  
758 involved in speciation. *Molecular Ecology Resources*, **10**, 806–820.
- 759 Peterson BK, Weber JN, Kay EH, Fisher HS, Hoekstra HE (2012) Double digest RADseq: an  
760 inexpensive method for de novo SNP discovery and genotyping in model and non-model  
761 species. *PLOS ONE*, **7**, e37135.
- 762 Piferrer F (2013) Epigenetics of sex determination and gonadogenesis. *Developmental Dynamics*,  
763 **242**, 360–370.
- 764 Pounds AJ, Bustamante MR, Coloma LA *et al.* (2006) Widespread amphibian extinctions from  
765 epidemic disease driven by global warming. *Nature*, **439**, 161–167.
- 766 Pryor S., Scavia D, Downer C *et al.* (2014) Chapter 18: Midwest. In: *Climate Change Impacts in*  
767 *the United States: The Third National Climate Assessment* (eds Melillo JM, Richmond TC,  
768 Yohe GW), pp. 418–440. U.S. Global Change Research Program.
- 769 Qin D, Plattner G, Tignor M *et al.* (2013) *Summary for policymakers. Climate change 2013: the*  
770 *physical science basis. Contribution of Working Group I to the fifth assessment report of the*  
771 *Intergovernmental Panel on Climate Change*, eds Stocker, TF *et al.* Cambridge University  
772 Press, Cambridge, UK.
- 773 Raabe EA, Stumpf RP (2016) Expansion of tidal marsh in response to sea-level rise: Gulf Coast  
774 of Florida, USA. *Estuaries and Coasts*, **39**, 145–157.
- 775 Remington CL (1968) Suture-zones of hybrid interaction between recently joined biotas. In:



- 776 *Evolutionary Biology* (ed Dobzhansky T), pp. 321–428. Springer, New York, NY.
- 777 Rhymer JM, Simberloff D (1996) Extinction by hybridization and introgression. *Annual Review*  
778 *of Ecology and Systematics*, **27**, 83–109.
- 779 Ricketts TH (1999) *Terrestrial ecoregions of North America: a conservation assessment*. Island  
780 Press, Washington, DC.
- 781 Rissler LJ, Smith WH (2010) Mapping amphibian contact zones and phylogeographical break  
782 hotspots across the United States. *Molecular Ecology*, **19**, 5404–5416.
- 783 Rödin-Mörch P, Luquet E, Meyer-Lucht Y *et al.* (2019) Latitudinal divergence in a wide-spread  
784 amphibian: contrasting patterns of neutral and adaptive genomic variation. *Molecular*  
785 *Ecology*, **28**, 2996–3011.
- 786 Roman J, Santhuff SD, Moler PE, Bowen BW (1999) Population structure and cryptic  
787 evolutionary units in the alligator snapping turtle. *Conservation Biology*, **13**, 135–142.
- 788 Rosenberg NA (2004) DISTRUCT: a program for the graphical display of population structure.  
789 *Molecular Ecology Notes*, **4**, 137–138.
- 790 Rosenzweig C, Karoly D, Vicarelli M *et al.* (2008) Attributing physical and biological impacts to  
791 anthropogenic climate change. *Nature*, **453**, 353–357.
- 792 Roth M, Obaidat A, Hagenbuch B (2012) OATPs, OATs and OCTs: the organic anion and cation  
793 transporters of the *SLCO* and *SLC22A* gene superfamilies. *British Journal of Pharmacology*,  
794 **165**, 1260–1287.
- 795 Ryan SF, Deines JM, Scriber JM *et al.* (2018) Climate-mediated hybrid zone movement revealed  
796 with genomics, museum collection, and simulation modeling. *Proceedings of the National*  
797 *Academy of Sciences*, 2017–14950.
- 798 Samson F, Knopf F (1994) Prairie conservation in North America. *Bioscience*, **44**, 418–421.
- 799 Samson FB, Knopf FL, Ostlie WR (2004) Great Plains ecosystems: past, present, and future.  
800 *Wildlife Society Bulletin*, **32**, 6–15.
- 801 Scott PA, Glenn TC, Rissler LJ (2019) Formation of a recent hybrid zone offers insight into the  
802 geographic puzzle and maintenance of species boundaries in musk turtles. *Molecular*  
803 *Ecology*, **28**, 761–771.
- 804 Seebacher F, White CR, Franklin CE (2015) Physiological plasticity increases resilience of  
805 ectothermic animals to climate change. *Nature Climate Change*, **5**, 61–66.
- 806 Seehausen O, Takimoto G, Roy D, Jokela J (2008) Speciation reversal and biodiversity dynamics  
807 with hybridization in changing environments. *Molecular Ecology*, **17**, 30–44.
- 808 Sgrò CM, Terblanche JS, Hoffmann AA (2016) What Can Plasticity Contribute to Insect  
809 Responses to Climate Change? *Annual Review of Entomology*, **61**, 433–451.
- 810 Shaffer HB, Minx P, Warren DE *et al.* (2013) The western painted turtle genome, a model for the

- 811 evolution of extreme physiological adaptations in a slowly evolving lineage. *Genome*  
812 *Biology*, **14**, R28.
- 813 Sinervo B, Méndez-de-la-Cruz F, Miles DB *et al.* (2010) Erosion of lizard diversity by climate  
814 change and altered thermal niches. *Science*, **328**, 894–9.
- 815 Smith DJ, Amarasekare P (2018) Toward a Mechanistic Understanding of Thermal Niche  
816 Partitioning. *The American Naturalist*, **191**, E57–E75.
- 817 Stapanian MA, Cassell DL, Cline SP (1997) Regional patterns of local diversity of trees:  
818 associations with anthropogenic disturbance. *Forest Ecology and Management*, **93**, 33–44.
- 819 Stapanian MA, Sundberg SD, Baumgardner GA, Liston A (1998) Alien plant species  
820 composition and associations with anthropogenic disturbance in North American forests.  
821 *Plant Ecology*, **139**, 49–62.
- 822 Storey KB (2006) Reptile freeze tolerance: metabolism and gene expression. *Cryobiology*, **52**, 1–  
823 16.
- 824 Swenson NG, Howard DJ (2004) Do suture zones exist? *Evolution*, **58**, 2391–2397.
- 825 Swenson NG, Howard DJ (2005) Clustering of contact zones, hybrid zones, and phylogeographic  
826 breaks in North America. *The American Naturalist*, **166**, 581–591.
- 827 Takeshima H, Shimuta M, Komazaki S *et al.* (1998) Mitsugumin29, a novel synaptophysin  
828 family member from the triad junction in skeletal muscle. *The Biochemical Journal*, **331**,  
829 317–22.
- 830 Taylor SA, Larson EL, Harrison RG (2015) Hybrid zones: windows on climate change. *Trends in*  
831 *Ecology and Evolution*, **30**, 398–406.
- 832 Taylor SA, White TA, Hochachka WM *et al.* (2014) Climate-mediated movement of an avian  
833 hybrid zone. *Current Biology*, **24**, 671–676.
- 834 Teske PR, Sandoval-Castillo J, Golla TR *et al.* (2019) Thermal selection as a driver of marine  
835 ecological speciation. *Proceedings of the Royal Society B: Biological Sciences*, **286**,  
836 20182023.
- 837 Tiffin P, Ross-Ibarra J (2014) Advances and limits of using population genetics to understand  
838 local adaptation. *Trends in Ecology and Evolution*, **29**, 673–680.
- 839 Todesco M, Pascual MA, Owens GL *et al.* (2016) Hybridization and extinction. *Evolutionary*  
840 *Applications*, **9**, 892–908.
- 841 Urban MC, Richardson JL, Freidenfelds NA (2014) Plasticity and genetic adaptation mediate  
842 amphibian and reptile responses to climate change. *Evolutionary Applications*, **7**, 88–103.
- 843 Via S (2009) Natural selection in action during speciation. *Proceedings of the National Academy*  
844 *of Sciences*, **106**, 9939–9946.
- 845 Waterhouse MD, Erb LP, Beever EA, Russello MA (2018) Adaptive population divergence and

- 846 directional gene flow across steep elevational gradients in a climate-sensitive mammal.  
847 *Molecular Ecology*, **27**, 2512–2528.
- 848 Wear DN, Greis JG (2002) Southern forest resource assessment: summary of findings. *Journal of*  
849 *Forestry*, **100**, 6–14.
- 850 Weilinger N, Tang P, Thompson R (2012) Anoxia-induced NMDA receptor activation opens  
851 pannexin Channels via *src* Family Kinases. *The Journal of Neuroscience*, **32**, 12579–12588.
- 852 Wimberly MC, Narem DM, Bauman PJ, Carlson BT, Ahlering MA (2018) Grassland  
853 connectivity in fragmented agricultural landscapes of the north-central United States.  
854 *Biological Conservation*, **217**, 121–130.
- 855 Winter M, Fiedler W, Hochachka WM *et al.* (2016) Patterns and biases in climate change  
856 research on amphibians and reptiles: a systematic review. *Royal Society Open Science*, **3**,  
857 160158.
- 858 Wringe BF, Stanley RRE, Jeffery NW, Anderson EC, Bradbury IR (2017a)  
859 HYBRIDDETECTIVE: a workflow and package to facilitate the detection of hybridization  
860 using genomic data in R. *Molecular Ecology Resources*, **17**, e275–e284.
- 861 Wringe BF, Stanley RRE, Jeffery NW, Anderson EC, Bradbury IR (2017b) *parallelnewhybrid*:  
862 an R package for the parallelization of hybrid detection using NEWHYBRIDS. *Molecular*  
863 *Ecology Resources*, **17**, 91–95.
- 864 Yatsu R, Miyagawa S, Kohno S *et al.* (2016) RNA-seq analysis of the gonadal transcriptome  
865 during *Alligator mississippiensis* temperature-dependent sex determination and  
866 differentiation. *BMC Genomics*, **17**, 77.
- 867
- 868

869 **DATA ACCESSIBILITY**

870 Upon acceptance for publication, the raw ddRADseq reads will be available as an NCBI sequence  
871 read archive (SRA), and the scripts, SNP input files, and metadata will be stored in a DRYAD  
872 digital repository.

873

874 **AUTHOR CONTRIBUTIONS**

875 BTM and TKC conceived the research, laboratory, and analytical tools, scripts and approaches.  
876 BTM performed the lab work, analyzed the data, conducted the bioinformatics analyses, and  
877 wrote the manuscript. MRD and MED were the study supervisors, guided the study design, and  
878 provided funding. JSP facilitated the collection of thousands of *Terrapene* tissues and provided  
879 expertise in methodological development. RDB collected hundreds of *Terrapene* tissues from  
880 southeastern North America and facilitated the collection of many additional individuals. CAP  
881 provided tissues from the midwestern hybrid zone as well as sample site expertise in Illinois. All  
882 authors contributed to editing and revising the manuscript.

883 **Table 1:** Population-level genotype frequency proportions derived from four NEWHYBRIDS  
 884 analyses involving the GU=Gulf Coast (*T. c. major*), EA=Eastern (*T. c. carolina*), TT=Three-toed  
 885 (*T. m. triunguis*), and ON=Ornate (*T. o. ornata*) box turtles, plus *T. carolina* (TC=subspecies  
 886 unidentified in the field). The second two letters in the population ID correspond to locality  
 887 according to U.S. state (AL=Alabama, FL=Florida, LA=Louisiana, SC=South Carolina,  
 888 GA=Georgia, MS=Mississippi, and IL=Illinois). Columns depict the proportion of assignment to  
 889 parental (P<sub>1</sub> and P<sub>2</sub>), first and second-generation hybrid (F<sub>1</sub> and F<sub>2</sub>), backcross (B<sub>1</sub> and B<sub>2</sub>), and  
 890 unassigned (FN) genotype frequency classes.

| Population | P <sub>1</sub> | P <sub>2</sub> | F <sub>1</sub> | F <sub>2</sub> | B <sub>1</sub> | B <sub>2</sub> | FN   |
|------------|----------------|----------------|----------------|----------------|----------------|----------------|------|
| GUxEA      |                |                |                |                |                |                |      |
| PureGU     | 1.00           | 0.00           | 0.00           | 0.00           | 0.00           | 0.00           | 0.00 |
| PureEA     | 0.00           | 1.00           | 0.00           | 0.00           | 0.00           | 0.00           | 0.00 |
| EAAL       | 0.00           | 1.00           | 0.00           | 0.00           | 0.00           | 0.00           | 0.00 |
| GUFL       | 0.46           | 0.04           | 0.00           | 0.08           | 0.21           | 0.00           | 0.21 |
| TCAL       | 0.02           | 0.86           | 0.00           | 0.02           | 0.02           | 0.00           | 0.08 |
| GUAL       | 0.20           | 0.20           | 0.00           | 0.00           | 0.00           | 0.00           | 0.60 |
| EAxTT      |                |                |                |                |                |                |      |
| PureEA     | 1.00           | 0.00           | 0.00           | 0.00           | 0.00           | 0.00           | 0.00 |
| PureTT     | 0.00           | 1.00           | 0.00           | 0.00           | 0.00           | 0.00           | 0.00 |
| TTLA       | 0.00           | 1.00           | 0.00           | 0.00           | 0.00           | 0.00           | 0.00 |
| EASC       | 0.47           | 0.00           | 0.00           | 0.00           | 0.40           | 0.00           | 0.13 |
| TCGA       | 0.80           | 0.00           | 0.00           | 0.00           | 0.00           | 0.10           | 0.10 |
| EAGA       | 0.91           | 0.00           | 0.00           | 0.00           | 0.05           | 0.00           | 0.05 |
| TCAL       | 0.96           | 0.00           | 0.00           | 0.00           | 0.04           | 0.00           | 0.00 |
| TTxGU      |                |                |                |                |                |                |      |
| PureTT     | 0.00           | 1.00           | 0.00           | 0.00           | 0.00           | 0.00           | 0.00 |
| PureGU     | 1.00           | 0.00           | 0.00           | 0.00           | 0.00           | 0.00           | 0.00 |
| GUAL       | 0.60           | 0.00           | 0.00           | 0.00           | 0.20           | 0.00           | 0.20 |
| TTMS       | 0.00           | 0.50           | 0.00           | 0.17           | 0.00           | 0.06           | 0.28 |
| TTLA       | 0.00           | 1.00           | 0.00           | 0.00           | 0.00           | 0.00           | 0.00 |
| TCMS       | 0.43           | 0.00           | 0.00           | 0.00           | 0.57           | 0.00           | 0.00 |
| GUMS       | 0.52           | 0.02           | 0.00           | 0.00           | 0.13           | 0.04           | 0.28 |
| GUFL       | 0.88           | 0.04           | 0.00           | 0.00           | 0.04           | 0.00           | 0.04 |
| ONxEA      |                |                |                |                |                |                |      |
| PureON     | 1.00           | 0.00           | 0.00           | 0.00           | 0.00           | 0.00           | 0.00 |
| PureEA     | 0.00           | 1.00           | 0.00           | 0.00           | 0.00           | 0.00           | 0.00 |
| ONIL       | 0.74           | 0.21           | 0.05           | 0.00           | 0.00           | 0.00           | 0.00 |
| EAIL       | 0.00           | 0.98           | 0.00           | 0.00           | 0.00           | 0.00           | 0.03 |

891

**Table 2:** Potential functions of outlier mRNA loci derived from transcriptomic clines (Fig. 5). The significance threshold ( $\alpha$ ) was determined using a Bonferroni correction for multiple tests. Gene abbreviations in bold with an asterisk (\*) differ significantly from neutral expectation. EA=Eastern (*T. c. carolina*), GU=Gulf Coast (*T. c. major*), TT=Three-toed (*T. m. triunguis*).

| Gene Abbr.<br>(P-value)    | Genotype†<br>P <sub>1</sub> /H/P <sub>2</sub> ‡ | Full Gene Name                                              | Possible Function(s)                                            | Source(s)                                                                    |
|----------------------------|-------------------------------------------------|-------------------------------------------------------------|-----------------------------------------------------------------|------------------------------------------------------------------------------|
| EAXGU ( $\alpha = 0.01$ )  |                                                 |                                                             |                                                                 |                                                                              |
| <b>SULT (P = 0)*</b>       | +/-                                             | Amine Sulfotransferase-like                                 | Regulates steroids in yolk during TSD§                          | (Bowden <i>et al.</i> 2000; Paitz & Bowden 2008)                             |
| <b>TLR9 (P = 0)*</b>       | +/-                                             | Toll-like Receptor 9                                        | Immune Response to Pathogens                                    | (Babik <i>et al.</i> 2015)                                                   |
| <b>ZNF236 (P = 0)*</b>     | +/-                                             | Zinc Finger Protein 236                                     | Gonadogenesis involved with TSD§                                | (Piferrer 2013)                                                              |
| <b>Oacy1 (P = 0)*</b>      | N/+                                             | O-acyltransferase (Ghrelin)                                 | Stimulates feeding behavior, maintains fasting blood glucose    | (Kojima <i>et al.</i> 1999; Goldberg <i>et al.</i> 2013)                     |
| EAXTT ( $\alpha = 0.007$ ) |                                                 |                                                             |                                                                 |                                                                              |
| <b>SASH3 (P = 0)*</b>      | +/-N                                            | SAM and SH3 Domain Containing 3                             | Immune signaling; anoxic cell death                             | (Weilinger <i>et al.</i> 2012; Campbell <i>et al.</i> 2018)                  |
| <b>SYPL2 (P = 0)*</b>      | +/-N                                            | Synaptophysin-like Protein 2                                | Maintenance of [Ca <sup>2+</sup> ] during anoxia                | (Takekuma <i>et al.</i> 1998; Pamerter <i>et al.</i> 2016)                   |
| FAM89B (0.036)             | N/N                                             | Family with Sequence Similarity 89, member B                | Upregulated in hypoxic conditions                               | (Goyal & Longo 2014)                                                         |
| <b>CITED4 (P = 0)*</b>     | N/N/+                                           | Cbp/p300 Interacting Transactivator, Domain 4               | Inhibits hypoxia-activated transcription                        | (Fox <i>et al.</i> 2004)                                                     |
| <b>TLR9 (P = 0)*</b>       | +/-N                                            | Toll-like Receptor 9                                        | Immune Response to Pathogens                                    | (Babik <i>et al.</i> 2015)                                                   |
| SLCO1A2 (0.009)            | N/N/+                                           | Solute Carrier Organic Anion Transporter, family member 1A2 | Cellular absorption, distribution, and excretion of xenobiotics | (Roth <i>et al.</i> 2012)                                                    |
| GUXTT ( $\alpha = 0.007$ ) |                                                 |                                                             |                                                                 |                                                                              |
| <b>SASH3 (P = 0)*</b>      | +/-N                                            | SAM and SH3 Domain Containing 3                             | Immune signaling; anoxic cell death                             | (Weilinger <i>et al.</i> 2012; Campbell <i>et al.</i> 2018)                  |
| <b>SYPL2 (P = 0)*</b>      | +/-N                                            | Synaptophysin-like Protein 2                                | Maintenance of [Ca <sup>2+</sup> ] during anoxia                | (Takekuma <i>et al.</i> 1998; Pamerter <i>et al.</i> 2016)                   |
| <b>FAM89B (P = 0)*</b>     | +/-N                                            | Family with Sequence Similarity 89, member B                | Upregulated in hypoxic conditions                               | (Goyal & Longo 2014)                                                         |
| <b>ACAD11 (P = 0)*</b>     | +/-N                                            | Acyl-CoA Dehydrogenase, family member 11-like               | Lipid metabolism, responses to anoxia                           | (Gomez & Richards 2018)                                                      |
| <b>ESPNL (P = 0)*</b>      | -/+                                             | Espin-like Protein                                          | Gonadal sex determination (TSD§)                                | (Czerwinski <i>et al.</i> 2016; Yatsu <i>et al.</i> 2016)                    |
| <b>TMEM214 (P = 0)*</b>    | -/+                                             | Transmembrane Protein 214                                   | Stress-induced apoptosis during anoxia                          | (Milton & Prentice 2007; Kesaraju <i>et al.</i> 2009; Li <i>et al.</i> 2013) |

†Genotype Proportions: Overrepresented (+), underrepresented (-), or neutral (N)

‡Genotypes = P<sub>1</sub> (parent1; AA), H (heterozygous; Aa), and P<sub>2</sub> (parent2; aa)

§TSD = Temperature-dependent sex determination

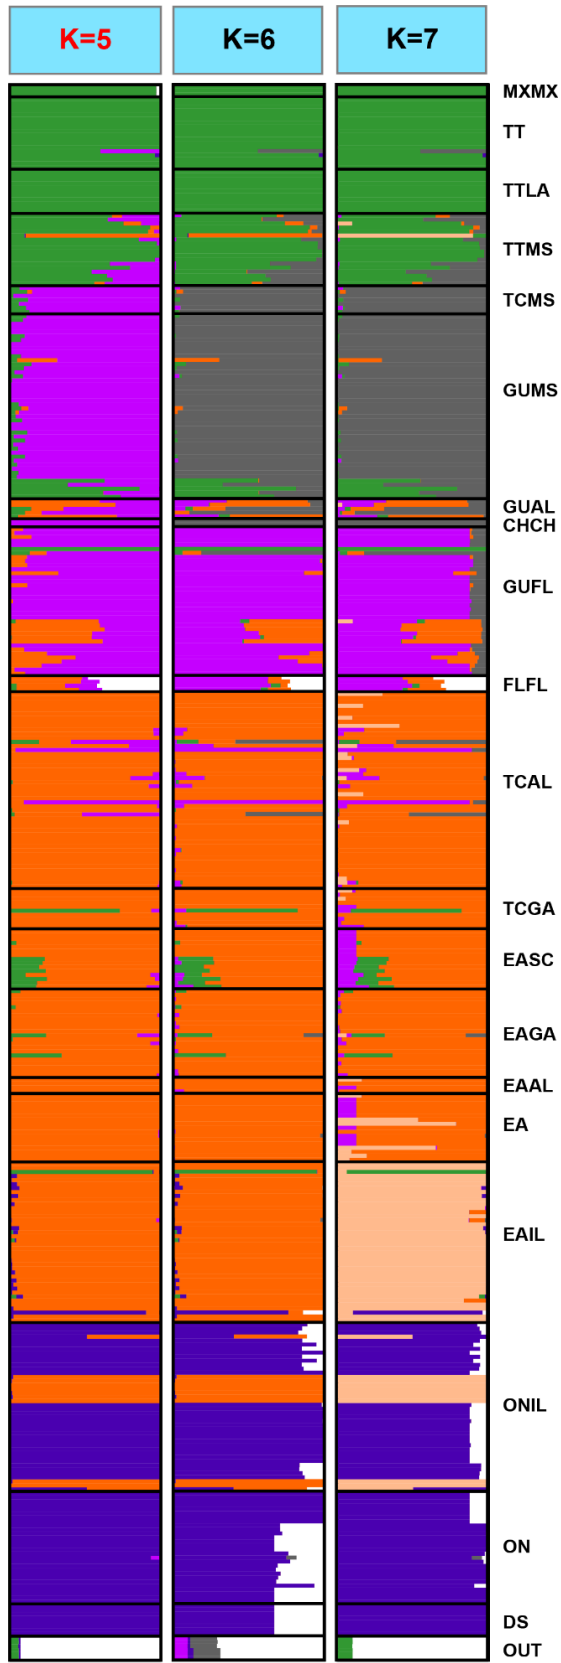

**Figure 1:** ADMIXTURE plot for K=5, K=6, and K=7 representing 12,128 unlinked SNPs across all sampled populations. The lowest cross-validation score was for K=5 ( $\bar{x}=0.18065$ ,  $SD=0.00217$ ); depicted at right in red), followed by K=6 ( $\bar{x}=0.18119$ ,  $SD=0.00333$ , and then K=7 (mean=0.18321,  $SD=0.00301$ ). Each bar represents a unique individual, and bars with mixed colors represent admixed ancestry. The first two letters of the populations correspond to subspecific field identification (OUT=outgroups, Spotted and Blanding's turtles, *Clemmys guttata* and *Emydoidea blandingii*; DS=Desert box turtle, *T. o. luteola*; ON=Ornate, *T. o. ornata*; EA=Eastern, *T. c. carolina*; FL=Florida, *T. c. bauri*; GU=Gulf Coast, *T. c. major*; TT=Three-toed, *T. m. triunguis*; MX=Mexican, *T. m. mexicana*; TC=*Terrapene carolina*, with subspecies unidentified in the field). The second two letters (if present) represent locality codes for U.S. or Mexican state (IL=Illinois; AL=Alabama; GA=Georgia; SC=South Carolina; FL=Florida; CH=Coahuila, Mexico; MS=Mississippi; LA=Louisiana; MX=Tamaulipas, Mexico). Populations lacking state locality code consisted of multiple localities sampled outside the hybrid zone.

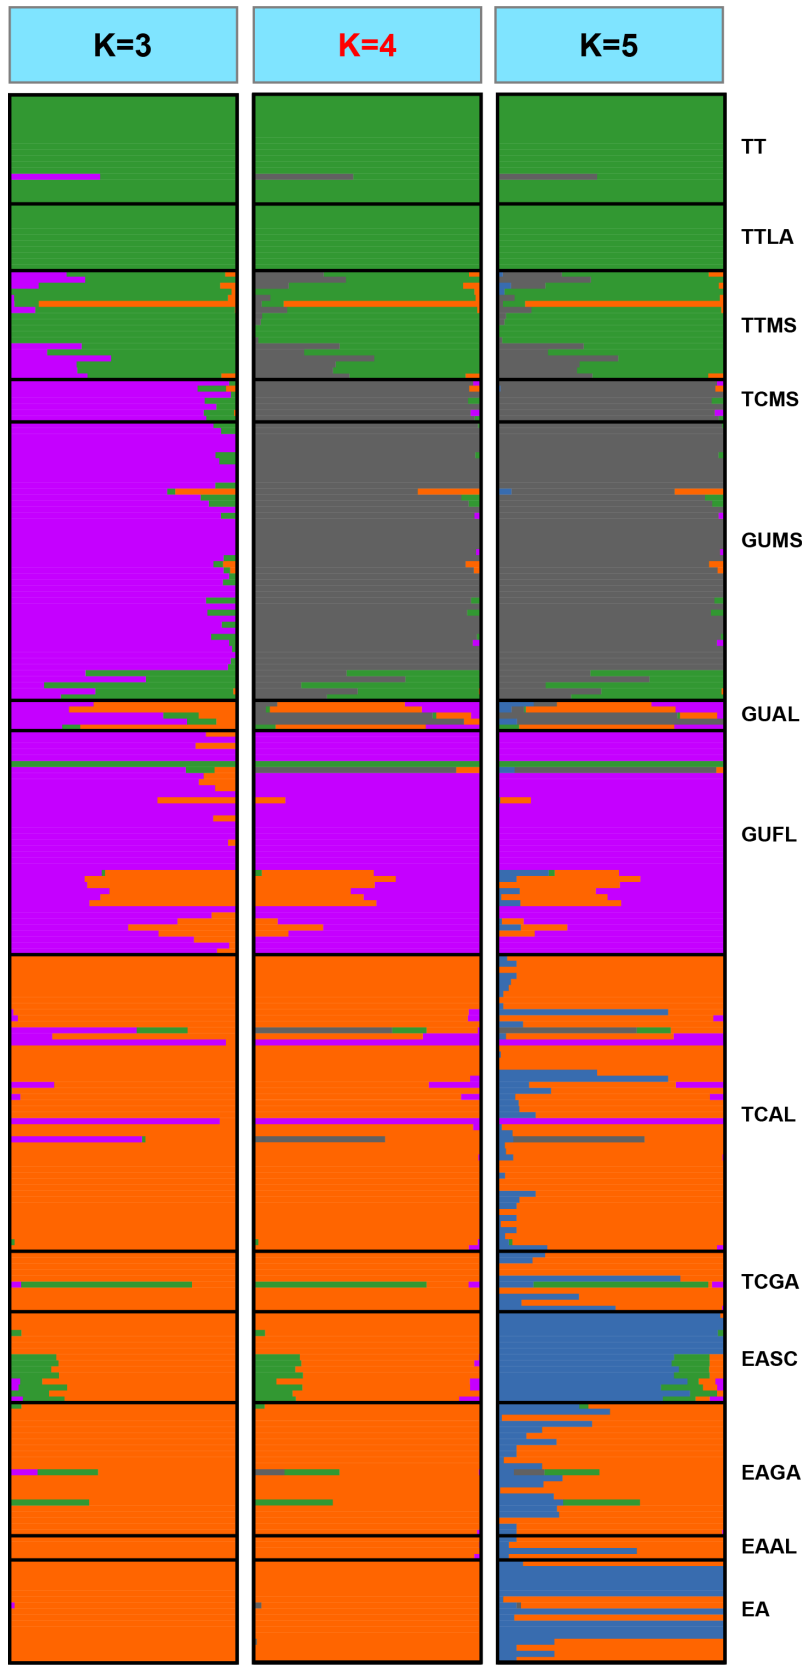

**Figure 2:** ADMIXTURE plot for K=3, K=4, and K=5 representing 11,142 unlinked SNPs across southeastern taxa. The lowest cross-validation score was for K=4 ( $\bar{x}=0.21851$ ,  $SD=0.00016$ ; depicted at right in red), followed by K=3 ( $\bar{x}=0.22134$ ,  $SD=0.00015$ ), and then K=5 ( $\bar{x}=0.22519$ ,  $SD=0.00082$ ). Each bar represents a unique individual, and bars with mixed colors depict admixed ancestry. The first two letters of the population codes correspond to subspecific field identification (EA=Eastern, *T. c. carolina*; GU=Gulf Coast, *T. c. major*; TT=Three-toed, *T. m. triunguis*; TC=*Terrapene carolina*, with subspecies unidentified in the field). The second two letters (if present) represent locality codes for U.S. states (AL=Alabama; GA=Georgia; SC=South Carolina; FL=Florida; MS=Mississippi; LA=Louisiana). Populations lacking a state locality code consisted of multiple localities sampled outside the hybrid zone.



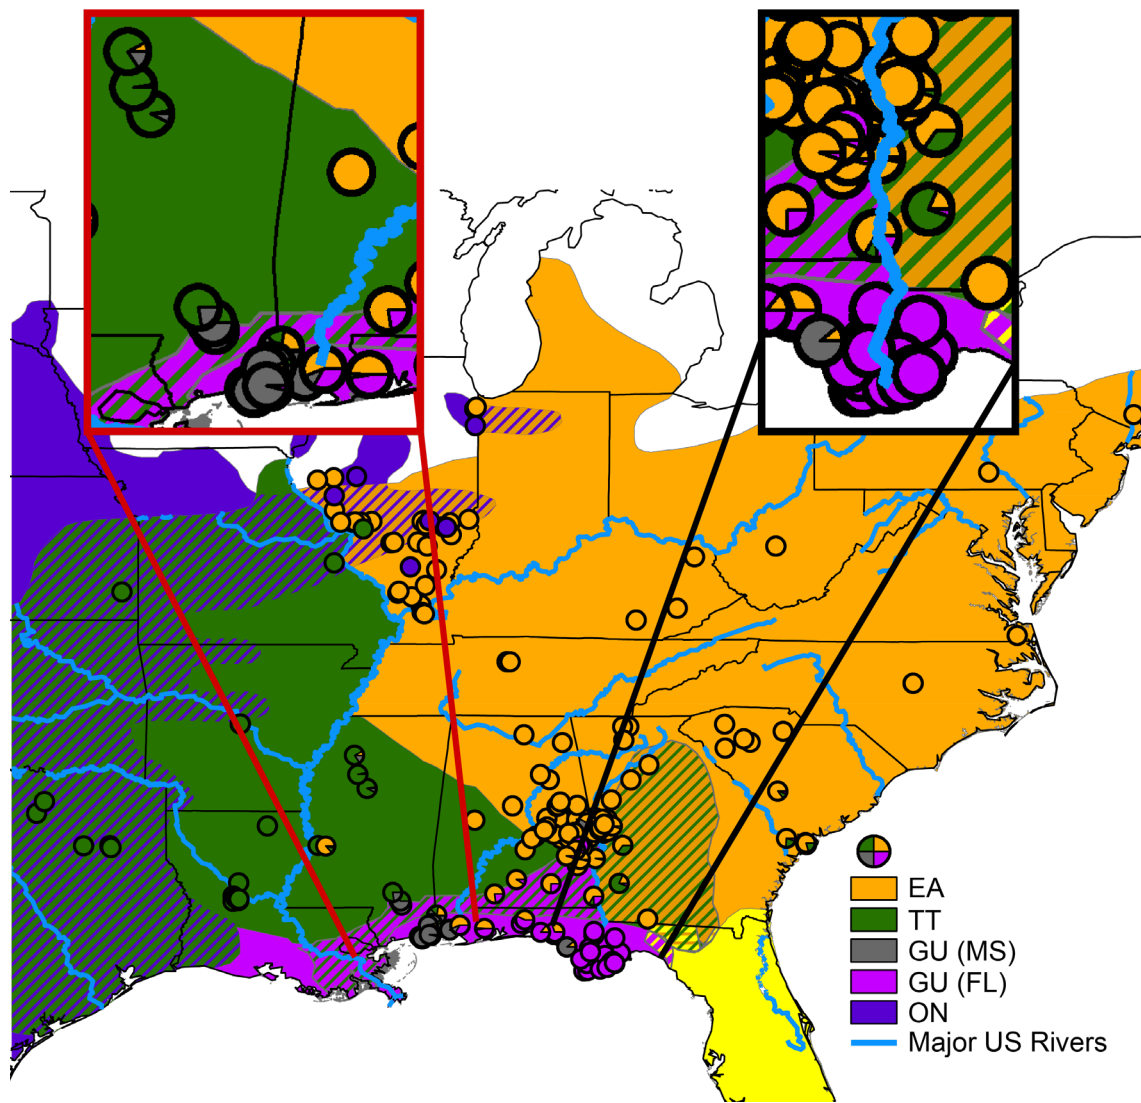

**Figure 3:** *Terrapene* distribution map. Cross-hatched areas represent contact zones. Circles indicate individual sampling localities, and the accompanying pie charts depict admixture proportions from the all-taxon  $K=5$  (for midwestern individuals) and southeastern  $K=4$  ADMIXTURE analyses (Fig. 1, 2). The expanded regions highlight two distinct *T. c. major* populations in the panhandles of Mississippi (red box) and Florida (black box), located in the Alabama and Apalachicola river basins, respectively. EA=Eastern (*T. c. carolina*), TT=Three-toed (*T. m. triunguis*), GU=Gulf Coast (*T. c. major*), ON=Ornate (*T. o. ornata*).

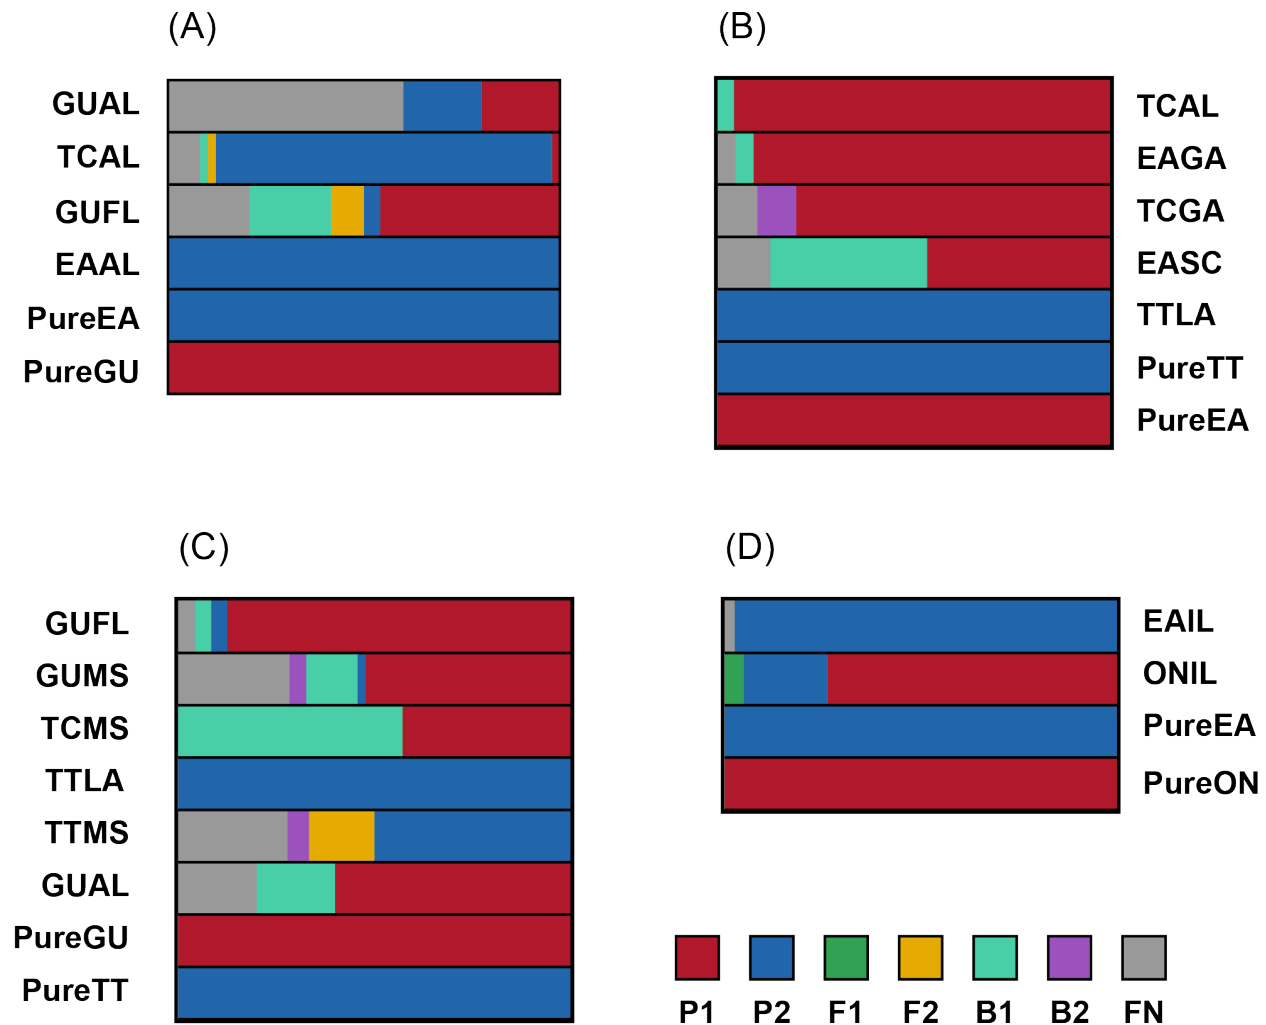

**Figure 4:** Population-level NEWHYBRIDS plots for four pairs of southeastern and midwestern *Terrapene* taxa. Individuals were collapsed into populations based on field identification at the subspecific level. The first two characters represent: GU=Gulf Coast, *T. c. major*; EA=Eastern, *T. c. carolina*; TT=Three-toed, *T. m. triunguis*; ON=Ornate, *T. o. ornata*; TC=*T. carolina* (limited to species-level field identification). The last two characters represent U.S. state: AL=Alabama, FL=Florida, MS=Mississippi, SC=South Carolina, GA=Georgia, LA=Louisiana, and IL=Illinois). Each plot corresponds to tests between parental groups (A) EAxGU (N=109), (B) EAxTT (N=135), (C) GUxTT (N=139), and (D) EAxON (N=112). A posterior probability threshold of >0.8 was required for genotype frequency class assignments. The genotype classes included P<sub>1</sub> and P<sub>2</sub> (parental types), F<sub>1</sub> and F<sub>2</sub> (first and second-generation hybrids), backcrosses (B<sub>1</sub> and B<sub>2</sub>), and FN (unclassified).

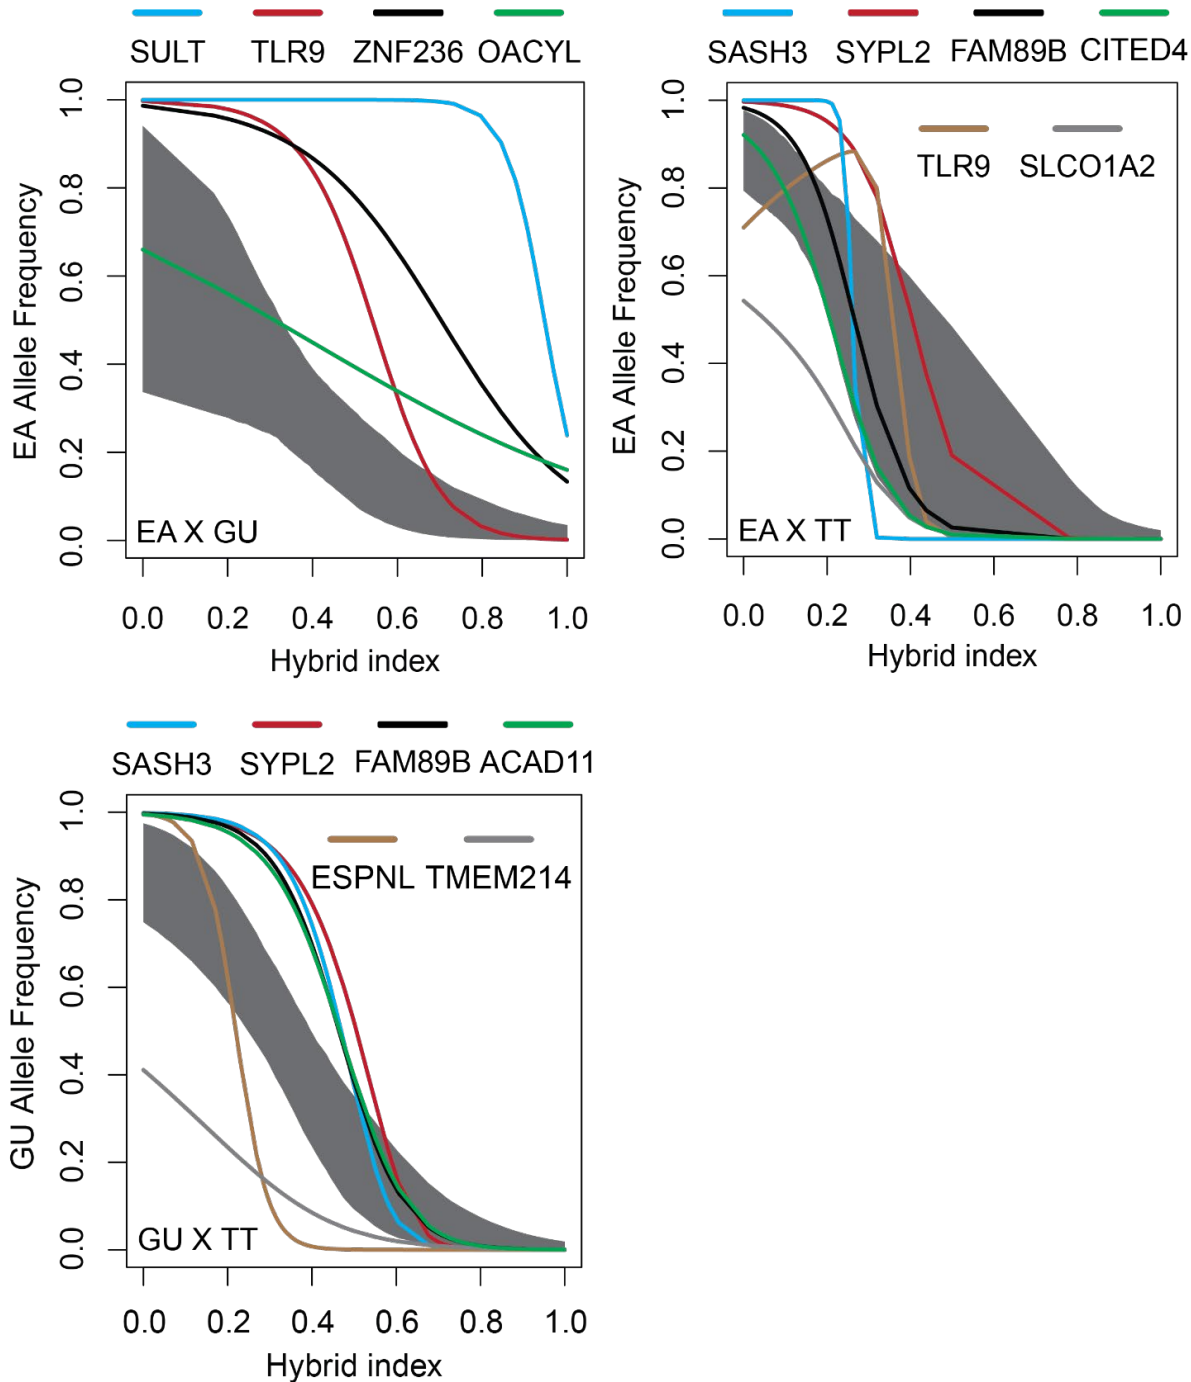

**Figure 5:** Genomic clines that depict outlier SNPs found in mRNA ddRAD loci. Pairwise comparisons are between EA=Eastern (*T. c. carolina*), GU=Gulf Coast (*T. c. major*), and TT=Three-toed (*T. m. triunguis*) box turtles. The gray area represents neutral expectations based on 2,660 (EAxGU), 2,623 (EAxTT), and 2,622 (GUxTT) transcriptome-aligned SNPs, and each line is a genomic cline for a single outlier locus. Locus abbreviations for each cline are defined in Table 2.
